# Supplementary material for: Umbrella systematic review finds limited evidence that school absence explains the association between chronic health conditions and lower academic attainment
Source: Front Public Health. 2023 Jun 9;11:1122769. doi: 10.3389/fpubh.2023.1122769 (PMC10288991; doi:10.3389/fpubh.2023.1122769)
Supplement: Supplementary file 5 [file Data_Sheet_1.XLSX]

## Sheet: All 472 studies
rev_id	rev_auth	rev_year	rev_condition	n_studies_education	n_studies_total	study_id	study_auth	study_year	study_country	community_sample	sample_size	outcomes	absence_mediation_tested	absence_mediation_results	notes
1	Alsagaff & Coyne	2020	Chronic pain	2	14	1	Logan et al	2008	USA	0	220	Perceived achievement	0	NA
1	Alsagaff & Coyne	2020	Chronic pain	2	14	2	Matthews	2002	UK	0	10	Grade retention	0	NA
2	Caird et al	2013	Obesity	29	29	3	Averett & Stifel	2007	USA	1	12000	Standardised tests	0	NA
2	Caird et al	2013	Obesity	29	29	4	Bagully	2006	USA	1	1503	Standardised tests	0	Absence entered into model at last stage with other factors such as SEP so impossible to know its independent effect
2	Caird et al	2013	Obesity	29	29	5	Castelli et al	2007	USA	1	259	Standardised tests	0	NA
2	Caird et al	2013	Obesity	29	29	6	Chomitz et al	2009	USA	1	1103	Standardised tests	0	NA
2	Caird et al	2013	Obesity	29	29	7	Chowdhury et al	2008	USA	1	8594	Standardised tests	0	NA
2	Caird et al	2013	Obesity	29	29	8	Cottrell et al	2007	USA	1	968	Standardised tests	0	NA
2	Caird et al	2013	Obesity	29	29	9	Crosnoe & Muller	2004	USA	1	11658	School grades	0	NA
2	Caird et al	2013	Obesity	29	29	10	Datar & Sturm	2006	USA	1	7000	Standardised tests	0	NA
2	Caird et al	2013	Obesity	29	29	11	Datar et al	2004	USA	1	11192	Standardised tests	0	NA
2	Caird et al	2013	Obesity	29	29	12	Ding et al	2006	USA	1	807	School grades	0	NA
2	Caird et al	2013	Obesity	29	29	13	Elrod	2008	USA	1	3369	School grades	0	NA
2	Caird et al	2013	Obesity	29	29	14	Fletcher & Lehrer	2008	USA	1	1684	Standardised tests	0	NA
2	Caird et al	2013	Obesity	29	29	15	Florence et al	2008	USA	1	4589	Standardised tests	0	NA
2	Caird et al	2013	Obesity	29	29	16	Gable et al	2008	USA	1	8000	Standardised tests	0	NA
2	Caird et al	2013	Obesity	29	29	17	Gregg et al	2008	UK	1	9476	School grades	0	NA
2	Caird et al	2013	Obesity	29	29	18	Huang et al	2006	USA	1	666	School grades	0	NA
2	Caird et al	2013	Obesity	29	29	19	Judge & Jahns	2007	USA	1	13680	Standardised tests	0	NA
2	Caird et al	2013	Obesity	29	29	21	Kaestner & Grossman	2008	USA	1	12000	Standardised tests	0	NA
2	Caird et al	2013	Obesity	29	29	20	Kaestner et al	2009	USA	1	2668	Standardised tests	0	NA
2	Caird et al	2013	Obesity	29	29	22	Kim et al	2003	South Korea	1	6463	School grades	0	NA
2	Caird et al	2013	Obesity	29	29	23	Li et al	2008	USA	1	2519	Standardised tests	0	NA
2	Caird et al	2013	Obesity	29	29	24	Mikkila et al	2003	Finland	1	60252	School grades	0	NA
2	Caird et al	2013	Obesity	29	29	25	Pesa et al	2000	USA	1	3197	School grades	0	NA
2	Caird et al	2013	Obesity	29	29	26	Sabia	2007	USA	1	5129	School grades	1	Among white females, obesity was associated with lower academic performance after adjusting for a number of covariates. Further adjusting for absence made no difference.
2	Caird et al	2013	Obesity	29	29	27	Shore et al	2008	USA	1	566	School grades	0	NA
2	Caird et al	2013	Obesity	29	29	28	Sigfúsdóttir et al	2007	Iceland	1	5810	School grades	0	Not possible to assess mediation as entered first with other variables
2	Caird et al	2013	Obesity	29	29	29	von Hinke Kessler Scholder et al	2009	UK	1	3500	School grades	0	NA
2	Caird et al	2013	Obesity	29	29	30	Wang & Veugelers	2008	Canada	1	4945	Standardised tests	0	NA
2	Caird et al	2013	Obesity	29	29	31	Wendt	2009	USA	1	12719	Standardised tests	0	NA
3	Chen et al	2018	Chronic kidney disease	10	34	32	Bawden et al	2004	Canada	0	44	Standardised tests	0	NA
3	Chen et al	2018	Chronic kidney disease	10	34	33	Brouhard et al	2000	USA	0	124	Standardised tests	0	NA
3	Chen et al	2018	Chronic kidney disease	10	34	34	Crocker	2002	Canada	0	24	Standardised tests	0	NA	Not listed in biblio
3	Chen et al	2018	Chronic kidney disease	10	34	35	Duquette et al	2007	USA	0	71	Standardised tests	0	NA
3	Chen et al	2018	Chronic kidney disease	10	34	36	Fennell et al	1990	USA	0	112	Standardised tests	0	NA
3	Chen et al	2018	Chronic kidney disease	10	34	37	Fennell et al	1984	USA	0	38	Standardised tests	0	NA
3	Chen et al	2018	Chronic kidney disease	10	34	38	Hartung	2014	USA	0	66	Standardised tests	0	NA	Not listed in biblio
3	Chen et al	2018	Chronic kidney disease	10	34	39	Hooper et al	2011	USA	0	368	Standardised tests	0	NA
3	Chen et al	2018	Chronic kidney disease	10	34	40	Johnson	2013	USA	0	21	Standardised tests	0	NA	Not listed in biblio
3	Chen et al	2018	Chronic kidney disease	10	34	41	Lawry et al	1994	USA	0	24	Standardised tests	0	NA
4	Clayborne et al	2019	Depression	14	31	42	Bardone et al	1996	New Zealand	1	368	Attainment	0	NA
4	Clayborne et al	2019	Depression	14	31	43	Capaldi & Stoolmiller	1999	USA	1	206	Attainment	0	NA
4	Clayborne et al	2019	Depression	14	31	44	Fergusson & Woodward	2002	New Zealand	1	964	Attainment	0	NA
4	Clayborne et al	2019	Depression	14	31	45	Fleming et al	1993	Canada	1	652	Attainment	0	NA
4	Clayborne et al	2019	Depression	14	31	46	Franko et al	2005	USA	1	1727	Attainment	0	NA
4	Clayborne et al	2019	Depression	14	31	47	Giaconia et al	2001	USA	1	365	Attainment	0	NA
4	Clayborne et al	2019	Depression	14	31	48	Johnson et al	1999	USA	1	736	Attainment	0	NA
4	Clayborne et al	2019	Depression	14	31	49	Jonsson et al	2010	USA	1	609	Attainment	0	NA
4	Clayborne et al	2019	Depression	14	31	50	Kendal & Davies	1986	USA	1	1004	Attainment	0	NA
4	Clayborne et al	2019	Depression	14	31	51	Needham	2009	USA	1	14232	Attainment	0	NA
4	Clayborne et al	2019	Depression	14	31	52	Quiroga et al	2012	Canada	1	453	Attainment	0	NA
4	Clayborne et al	2019	Depression	14	31	53	Rao et al	1995	USA	0	63	Attainment	0	NA
4	Clayborne et al	2019	Depression	14	31	54	Vida et al	2009	Canada	1	219	Attainment	0	NA
4	Clayborne et al	2019	Depression	14	31	55	Wissman et al	1999	USA	0	110	Attainment	0	NA
5	Cocomello et al	2021	Congenital heart disease	32	42	77	Bang et al	2013	South Korea	0	85	Attainment	0	NA	Based in comparions with norms
5	Cocomello et al	2021	Congenital heart disease	32	42	78	Brandhagen et al	1991	USA	0	168	Attainment	0	NA
5	Cocomello et al	2021	Congenital heart disease	32	42	67	Bygstad et al	2012	Denmark	0	95	Attainment	0	NA	Based in comparions with norms
5	Cocomello et al	2021	Congenital heart disease	32	42	60	Caruana	2016	Malta	0	467	Attainment	0	NA	In meta-analysis
5	Cocomello et al	2021	Congenital heart disease	32	42	86	Connor et al	2019	USA	0	437	Attainment	0	NA	Based in comparions with norms
5	Cocomello et al	2021	Congenital heart disease	32	42	61	Eren et al	2015	Turkey	0	69	Attainment	0	NA	Cited as Kahya in paper; Based in comparions with norms
5	Cocomello et al	2021	Congenital heart disease	32	42	66	Eslami et al	2013	Iran	0	700	Attainment	0	NA	In meta-analysis
5	Cocomello et al	2021	Congenital heart disease	32	42	74	Fedchenko et al	2019	Sweden	0	72	Attainment	0	NA	Based in comparions with norms
5	Cocomello et al	2021	Congenital heart disease	32	42	58	Karsenty et al	2013	France	0	135	Attainment	0	NA	Based in comparions with norms
5	Cocomello et al	2021	Congenital heart disease	32	42	84	Lillehei et al	1986	USA	0	105	Attainment	0	NA
5	Cocomello et al	2021	Congenital heart disease	32	42	71	Lopez Barreda	2020	Chile	0	67	Attainment	0	NA	Cited as Barreda in paper
5	Cocomello et al	2021	Congenital heart disease	32	42	56	Madsen et al	2020	Denmark	1	75824	Attainment	0	NA	In meta-analysis
5	Cocomello et al	2021	Congenital heart disease	32	42	65	Martínez-Quintana et al	2020	Spain	0	169	Attainment	0	NA
5	Cocomello et al	2021	Congenital heart disease	32	42	73	Moller et al	1991	USA	0	290	Attainment	0	NA
5	Cocomello et al	2021	Congenital heart disease	32	42	79	Moons et al	2009	Belgium	0	619	Attainment	0	NA	Based in comparions with norms
5	Cocomello et al	2021	Congenital heart disease	32	42	70	Nieminen et al	2003	Finland	0	2896	Attainment	0	NA	Based in comparions with norms
5	Cocomello et al	2021	Congenital heart disease	32	42	62	Olsen et al	2011	Denmark	1	22603	Attainment	0	NA	In meta-analysis
5	Cocomello et al	2021	Congenital heart disease	32	42	69	Opic et al	2015	Netherlands	0	252	Attainment	0	NA	Based in comparions with norms
5	Cocomello et al	2021	Congenital heart disease	32	42	59	Otterstand et al	1986	Norway	0	125	Attainment	0	NA	Based in comparions with norms
5	Cocomello et al	2021	Congenital heart disease	32	42	63	Pfitzer et al	2018	Germany	1	1198	Attainment	0	NA	Based in comparions with norms
5	Cocomello et al	2021	Congenital heart disease	32	42	81	Rometsch et al	2019	Switzerland	0	327	Attainment	0	NA	In meta-analysis
5	Cocomello et al	2021	Congenital heart disease	32	42	57	Rose et al	2005	Germany	0	7466	Attainment	0	NA	In meta-analysis
5	Cocomello et al	2021	Congenital heart disease	32	42	85	Schiele et al	2019	USA	0	169	Attainment	0	NA
5	Cocomello et al	2021	Congenital heart disease	32	42	75	Shaefer et al	2016	Switzerland	0	50269	Attainment	0	NA	In meta-analysis
5	Cocomello et al	2021	Congenital heart disease	32	42	83	Simko et al	2003	USA	0	248	Attainment	0	NA	In meta-analysis
5	Cocomello et al	2021	Congenital heart disease	32	42	76	Sluman et al	2019	International (high income)	0	3989	Attainment	0	NA
5	Cocomello et al	2021	Congenital heart disease	32	42	64	Soufi et al	2013	France	0	60	Attainment	0	NA
5	Cocomello et al	2021	Congenital heart disease	32	42	82	Steiner et al	2020	USA	0	25	Attainment	0	NA
5	Cocomello et al	2021	Congenital heart disease	32	42	72	Ternestedt et al	2001	Sweden	0	26	Attainment	0	NA	Based in comparions with norms
5	Cocomello et al	2021	Congenital heart disease	32	42	80	Udholm et al	2019	Denmark	1	1260	Attainment	0	NA	In meta-analysis
5	Cocomello et al	2021	Congenital heart disease	32	42	68	Zomer et al	2012	Netherlands	0	8306	Attainment	0	NA	In meta-analysis
7	Esch et al	2014	Mental disorders	34	51	108	Barbaresi et al	2007	USA	1	1110	Attainment	0	NA
7	Esch et al	2014	Mental disorders	34	51	102	Bohon et al	2007	USA	1	240	Attainment	0	NA
7	Esch et al	2014	Mental disorders	34	51	95	Borges et al	2011	Mexico	1	2362	Attainment	0	NA
7	Esch et al	2014	Mental disorders	34	51	109	Bray et al	2000	USA	1	1392	Attainment	0	NA
7	Esch et al	2014	Mental disorders	34	51	114	Breslau et al	2008	USA	1	5692	Attainment	0	NA
7	Esch et al	2014	Mental disorders	34	51	119	Breslau et al	2012	USA	1	29662	Attainment	0	NA
7	Esch et al	2014	Mental disorders	34	51	101	Daniel et al	2006	USA	1	188	Attainment	0	NA
7	Esch et al	2014	Mental disorders	34	51	89	Degenhardt et al	2007	Australia	1	1520	Attainment	0	NA
7	Esch et al	2014	Mental disorders	34	51	112	Ellickson et al	2001	USA	1	4327	Attainment	0	NA
7	Esch et al	2014	Mental disorders	34	51	106	Ensminger et al	2003	USA	1	952	Attainment	0	NA
7	Esch et al	2014	Mental disorders	34	51	97	Fergusson et al	2003	New Zealand	1	1265	Attainment	0	NA
7	Esch et al	2014	Mental disorders	34	51	118	Fletcher	2008	USA	1	13000	Attainment	0	NA
7	Esch et al	2014	Mental disorders	34	51	100	Goulding et al	2010	USA	0	109	Attainment	0	NA
7	Esch et al	2014	Mental disorders	34	51	99	Hansen et al	1999	USA	0	36	Attainment	0	NA
7	Esch et al	2014	Mental disorders	34	51	98	Hemphälä & Hodgins	2014	Sweden	0	147	Attainment	0	NA
7	Esch et al	2014	Mental disorders	34	51	87	Horwood et al	2010	Australia and New Zealand	1	6316	Attainment	0	NA
7	Esch et al	2014	Mental disorders	34	51	104	Kent et al	2011	USA	1	539	Attainment	0	NA
7	Esch et al	2014	Mental disorders	34	51	116	Kessler et al	1995	USA	1	5877	Attainment	0	NA
7	Esch et al	2014	Mental disorders	34	51	110	Kogan et al	2005	USA	1	1762	Attainment	0	NA
7	Esch et al	2014	Mental disorders	34	51	105	Krohn et al	1997	USA	1	775	Attainment	0	NA
7	Esch et al	2014	Mental disorders	34	51	115	LeCook et al	2010	USA	1	5839	Attainment	0	NA
7	Esch et al	2014	Mental disorders	34	51	120	Lee et al	2009	World Mental Health Survey	1	41688	Attainment	0	NA
7	Esch et al	2014	Mental disorders	34	51	94	Legleye et al	2010	France	1	29393	Attainment	0	NA
7	Esch et al	2014	Mental disorders	34	51	90	Lynskey et al	2003	Australia	1	1535	Attainment	0	NA
7	Esch et al	2014	Mental disorders	34	51	103	Marti et al	2010	USA	1	496	Attainment	0	NA
7	Esch et al	2014	Mental disorders	34	51	113	McCaffrey et al	2010	USA	1	4375	Attainment	0	NA
7	Esch et al	2014	Mental disorders	34	51	117	McLeod	2012	USA	1	6315	Attainment	0	NA
7	Esch et al	2014	Mental disorders	34	51	88	Mcshane et al	2004	Australia	0	117	Attainment	0	NA
7	Esch et al	2014	Mental disorders	34	51	96	Miech et al	1999	New Zealand	1	901	Attainment	0	NA
7	Esch et al	2014	Mental disorders	34	51	111	Porche et al	2011	USA	1	2532	Attainment	0	NA
7	Esch et al	2014	Mental disorders	34	51	92	Quiroga et al	2012	Canada	1	453	Attainment	0	NA
7	Esch et al	2014	Mental disorders	34	51	93	Quiroga et al	2013	Canada	1	493	Attainment	0	NA
7	Esch et al	2014	Mental disorders	34	51	91	Van Ameringen et al	2003	Canada	0	201	Attainment	0	NA
7	Esch et al	2014	Mental disorders	34	51	107	Vander Stoep et al	2003	USA	1	967	Attainment	0	NA
8	Glinianaia et al	2021	Major structural congenital anomalies	32	39	121	Ayr et al	2005	USA	0	50	Standardised tests	0	NA
8	Glinianaia et al	2021	Major structural congenital anomalies	32	39	122	Barnes et al	2006	USA	0	192	Standardised tests	0	NA
8	Glinianaia et al	2021	Major structural congenital anomalies	32	39	123	Bell 2017b	2017	Australia	1	3238	School grades	0	NA
8	Glinianaia et al	2021	Major structural congenital anomalies	32	39	124	Bellinger et al	2015	USA	0	178	Standardised tests	0	NA
8	Glinianaia et al	2021	Major structural congenital anomalies	32	39	125	Broder et al	1998	USA	0	168	School grades	0	NA
8	Glinianaia et al	2021	Major structural congenital anomalies	32	39	126	Chapman	2011	USA	0	56	Standardised tests	0	NA
8	Glinianaia et al	2021	Major structural congenital anomalies	32	39	127	Clausen et al	2017	Denmark	1	14293	School grades	0	NA
8	Glinianaia et al	2021	Major structural congenital anomalies	32	39	128	Collett et al	2010	USA	0	94	Standardised tests	0	NA
8	Glinianaia et al	2021	Major structural congenital anomalies	32	39	129	Fitzsimons et al	2018	UK	1	2802	School grades	0	NA
8	Glinianaia et al	2021	Major structural congenital anomalies	32	39	130	Fitzsimons et al	2021	UK	1	3253	School grades	1	Absence did not mediate the assocation between cleft type and lower attainment. Cited Bell 2017: Absence adjusted for at start with others but effect not isolated
8	Glinianaia et al	2021	Major structural congenital anomalies	32	39	131	Fletcher et al	2005	USA	0	268	Standardised tests	0	NA
8	Glinianaia et al	2021	Major structural congenital anomalies	32	39	132	Friedrich et al	1991	USA	0	68	Standardised tests	0	NA
8	Glinianaia et al	2021	Major structural congenital anomalies	32	39	133	Grewal et al	2020	UK	1	205	School grades	0	NA
8	Glinianaia et al	2021	Major structural congenital anomalies	32	39	134	Hentges et al	2011	UK	0	170	Standardised tests	0	NA
8	Glinianaia et al	2021	Major structural congenital anomalies	32	39	135	Lawley et al	2019	Australia	1	262311	School grades	0	NA
8	Glinianaia et al	2021	Major structural congenital anomalies	32	39	136	Magge et al	2002	USA	0	16	Standardised tests	0	NA
8	Glinianaia et al	2021	Major structural congenital anomalies	32	39	137	Mahle et al	2000	USA	0	56	Standardised tests	0	NA
8	Glinianaia et al	2021	Major structural congenital anomalies	32	39	138	Mulkey et al	2016	USA	0	724	School grades	0	NA
8	Glinianaia et al	2021	Major structural congenital anomalies	32	39	139	Olsen et al	2011	Denmark	1	32232	Attainment	0	NA
8	Glinianaia et al	2021	Major structural congenital anomalies	32	39	140	Oster et al	2017	USA	1	9162	School grades	0	NA
8	Glinianaia et al	2021	Major structural congenital anomalies	32	39	141	Persson et al	2012	Sweden	1	1251396	School grades	0	NA
8	Glinianaia et al	2021	Major structural congenital anomalies	32	39	142	Saervold et al	2019	Norway	0	123	Standardised tests	0	NA
8	Glinianaia et al	2021	Major structural congenital anomalies	32	39	143	Schaefer et al	2016	Switzerland	1	28457	Attainment	0	NA
8	Glinianaia et al	2021	Major structural congenital anomalies	32	39	144	Simons et al	2010	USA	0	13	Standardised tests	0	NA
8	Glinianaia et al	2021	Major structural congenital anomalies	32	39	145	Speltz et al	2015	USA	0	365	Standardised tests	0	NA
8	Glinianaia et al	2021	Major structural congenital anomalies	32	39	146	Speltz et al	2017	USA & Canada	0	436	Standardised tests	0	NA
8	Glinianaia et al	2021	Major structural congenital anomalies	32	39	147	Watkins et al	2017	USA	1	7381	School grades	0	NA
8	Glinianaia et al	2021	Major structural congenital anomalies	32	39	148	Wehby et al	2014	USA	1	2462	Standardised tests	0	NA
8	Glinianaia et al	2021	Major structural congenital anomalies	32	39	149	Wills et al	1990	USA	0	47	Standardised tests	0	NA
8	Glinianaia et al	2021	Major structural congenital anomalies	32	39	150	Wotherspoon et al	2020	Australia	0	21	Standardised tests	0	NA
8	Glinianaia et al	2021	Major structural congenital anomalies	32	39	151	Wray & Sensky	2001	UK	0	98	Standardised tests	0	NA
8	Glinianaia et al	2021	Major structural congenital anomalies	32	39	152	Wright & Nolan	1994	Australia	0	65	Standardised tests	0	NA
9	Hale et al	2015	Chronic conditions (generic)	14	27	153	Bardone et al	1996	New Zealand	1	198	Attainment	0	NA	In Clayborne
9	Hale et al	2015	Chronic conditions (generic)	14	27	154	Best et al	2004	USA	0	130	Attainment	0	NA
9	Hale et al	2015	Chronic conditions (generic)	14	27	155	Biederman et al	2010	USA	0	103	Attainment	0	NA
9	Hale et al	2015	Chronic conditions (generic)	14	27	156	Fergusson & Woodward	2002	New Zealand	1	648	Attainment	0	NA	In Clayborne
9	Hale et al	2015	Chronic conditions (generic)	14	27	157	Fleming et al	1993	Canada	1	94	Attainment	0	NA	In Clayborne
9	Hale et al	2015	Chronic conditions (generic)	14	27	158	Fletcher	2008	USA	1	13000	Attainment	0	NA
9	Hale et al	2015	Chronic conditions (generic)	14	27	159	Galéra et al	2009	France	1	1264	Attainment	0	NA
9	Hale et al	2015	Chronic conditions (generic)	14	27	160	Gerhardt et al	2008	USA	0	91	Attainment	0	NA
9	Hale et al	2015	Chronic conditions (generic)	14	27	161	Giaconia et al	2001	USA	1	344	Attainment	0	NA	In Clayborne
9	Hale et al	2015	Chronic conditions (generic)	14	27	162	Gortmaker et al	1993	USA	1	10485	Attainment	0	NA
9	Hale et al	2015	Chronic conditions (generic)	14	27	163	Jonsson et al	2010	Sweden	1	588	Attainment	0	NA	In Clayborne
9	Hale et al	2015	Chronic conditions (generic)	14	27	164	Needham	2009	USA	1	14221	Attainment	0	NA	In Clayborne
9	Hale et al	2015	Chronic conditions (generic)	14	27	165	Stoep et al	2003	USA	1	174	Attainment	0	NA
9	Hale et al	2015	Chronic conditions (generic)	14	27	166	Yan	1998	China	0	290	Attainment	0	NA
10	Lah et al	2017	Temporal lobe epilepsy	6	6	167	Blanchette & Smith	2002	Canada	0	19	Standardised tests	0	NA
10	Lah et al	2017	Temporal lobe epilepsy	6	6	168	Camfield et al	1984	Canada	0	27	Standardised tests	0	NA
10	Lah et al	2017	Temporal lobe epilepsy	6	6	169	Chaix et al	2006	France	0	34	Standardised tests	0	NA
10	Lah et al	2017	Temporal lobe epilepsy	6	6	171	Lah & Smith	2014	Canada	0	57	Standardised tests	0	NA
10	Lah et al	2017	Temporal lobe epilepsy	6	6	172	Lah & Smith	2015	Canada	0	40	Standardised tests	0	NA
10	Lah et al	2017	Temporal lobe epilepsy	6	6	170	Vanasse et al	2005	Canada	0	60	Standardised tests	0	NA
30	Langevald et al	2017	Survivors of childhood cancer	13	30	175	Dolgin et al	1999	Israel	0	115	Attainment	0	NA	Ref 3 in paper
30	Langevald et al	2017	Survivors of childhood cancer	13	30	178	Evans & Radford	1995	UK	0	86	School grades	0	NA	Rdf 6 in prpdr
30	Langevald et al	2017	Survivors of childhood cancer	13	30	173	Felder-Puig et al	1998	Austria	0	75	Attainment	0	NA	Ref 7 in paper
30	Langevald et al	2017	Survivors of childhood cancer	13	30	184	Haupt et al	1994	USA	0	1002	Attainment	0	NA	Ref 12 in paper
30	Langevald et al	2017	Survivors of childhood cancer	13	30	183	Hays et al	1992	USA	0	409	Attainment	0	NA	Ref 14 in paper
30	Langevald et al	2017	Survivors of childhood cancer	13	30	181	Kaleghan et al	1988	USA	0	5544	Attainment	0	NA	Ref 18 in paper
30	Langevald et al	2017	Survivors of childhood cancer	13	30	176	Kingma et al	2000	Netherlands	0	228	Attainment	0	NA	Ref 20 in paper
30	Langevald et al	2017	Survivors of childhood cancer	13	30	179	Lansky et al	1986	USA	0	78	Attainment	0	NA	Ref 21 in paper
30	Langevald et al	2017	Survivors of childhood cancer	13	30	174	Makipernaa	1989	Finland	0	94	Attainment	0	NA	Ref 24 in paper
30	Langevald et al	2017	Survivors of childhood cancer	13	30	182	Meadows et al	1989	USA	0	190	Attainment	0	NA	Ref 25 in paper
30	Langevald et al	2017	Survivors of childhood cancer	13	30	177	Moe et al	1997	Norway	0	98	Attainment	0	NA	Ref 27 in paper
30	Langevald et al	2017	Survivors of childhood cancer	13	30	185	Novakovic et al	1997	USA	0	186	Attainment	0	NA	Ref 30 in paper
30	Langevald et al	2017	Survivors of childhood cancer	13	30	180	Wasserman et al	1987	USA	0	40	Attainment	0	NA	Ref 42 in paper
12	Martin et al	2017	Obesity	30	30	186	Afzal et al	2015	USA	1	4663	Standardised tests	0	NA
12	Martin et al	2017	Obesity	30	30	187	Bisset et al	2012	Canada	1	1959	School grades	0	NA
12	Martin et al	2017	Obesity	30	30	188	Black et al	2015	Australia	1	7225	School grades	0	NA
12	Martin et al	2017	Obesity	30	30	189	Booth et al	2014	UK	1	4260	School grades	0	NA
12	Martin et al	2017	Obesity	30	30	190	Capogrossi et al	2013	USA	1	21260	Standardised tests	0	NA
12	Martin et al	2017	Obesity	30	30	191	Carter et al	2010	Canada	1	2582	Standardised tests	0	NA
12	Martin et al	2017	Obesity	30	30	192	Chen et al	2012	Taiwan	1	409	School grades	0	NA
12	Martin et al	2017	Obesity	30	30	194	Crosnoe & Muller	2004	USA	1	11658	School grades	0	NA
12	Martin et al	2017	Obesity	30	30	193	Cueto	2005	Peru	1	438	School grades	0	NA
12	Martin et al	2017	Obesity	30	30	196	Datar & Sturm	2006	USA	1	7090	Standardised tests	0	NA
12	Martin et al	2017	Obesity	30	30	195	Datar et al	2004	USA	1	11192	Standardised tests	0	NA
12	Martin et al	2017	Obesity	30	30	197	Gable et al	2008	USA	1	8000	Standardised tests	0	NA
12	Martin et al	2017	Obesity	30	30	198	Gable et al	2012	USA	1	6250	Standardised tests	0	NA
12	Martin et al	2017	Obesity	30	30	199	Kenney et al	2015	USA	1	3362	Standardised tests	0	NA
12	Martin et al	2017	Obesity	30	30	200	Kranjac	2015	USA	1	5072	Standardised tests	0	NA
12	Martin et al	2017	Obesity	30	30	201	Li & O'Connelly 2012	2012	USA	1	6178	Standardised tests	0	NA
12	Martin et al	2017	Obesity	30	30	202	Lu et al	2014	Taiwan	1	8690	Standardised tests	0	NA
12	Martin et al	2017	Obesity	30	30	203	Manes	2015	USA	1	915	Standardised tests	0	NA
12	Martin et al	2017	Obesity	30	30	204	Mo-Suwan et al	1999	Thailand	1	2252	School grades	0	NA
12	Martin et al	2017	Obesity	30	30	205	Murasko et al	2015	USA	1	28770	Standardised tests	0	NA
12	Martin et al	2017	Obesity	30	30	206	Palermo & Dowd	2012	USA	1	2820	Standardised tests	0	NA
12	Martin et al	2017	Obesity	30	30	207	Roberts & Hao	2013	USA	1	3134	School grades	0	NA
12	Martin et al	2017	Obesity	30	30	208	Ruijsbroek et al	2015	Netherlands	1	1531	Standardised tests	0	NA
12	Martin et al	2017	Obesity	30	30	209	Sabia & Rees	2015	USA	1	11822	School grades	0	NA
12	Martin et al	2017	Obesity	30	30	210	Suchert et al	2016	Germany	1	1011	Standardised tests	0	NA
12	Martin et al	2017	Obesity	30	30	211	Telford et al	2012	Australia	1	757	School grades	0	NA
12	Martin et al	2017	Obesity	30	30	212	Veldwijk et al	2012	Netherlands	1	1543	Standardised tests	1	Overweight at 12 years of age was associated with school performance, measured as a standardised test. After adjusting for parental education, skipping breakfast and screen time, overweight was associated with a 0.16 reduction in test scores (95% CI -0.32, 0.00). Further adjustments as follows did not significantly attenuate this coefficient: being bullied (-0.13 [-0.29, 0.03]), mental health inv…
12	Martin et al	2017	Obesity	30	30	213	von Hinke Kessler Scholder et al	2012	UK	1	3001	School grades	0	NA
12	Martin et al	2017	Obesity	30	30	214	Wendt	2009	USA	1	12719	Standardised tests	0	NA
12	Martin et al	2017	Obesity	30	30	215	Zavodny et al	2013	USA	1	18820	Standardised tests	0	NA
13	Mckinley Yoder & Cantrell	2019	Chronic conditions (generic)	26	42	216	Bailet & Turk	2000	USA	0	110	Grade retention	0	NA
13	Mckinley Yoder & Cantrell	2019	Chronic conditions (generic)	26	42	217	Breslau et al	2008	USA	1	5691	Attainment	0	NA
13	Mckinley Yoder & Cantrell	2019	Chronic conditions (generic)	26	42	218	Breslau et al	2011	USA	1	29662	Attainment	0	NA
13	Mckinley Yoder & Cantrell	2019	Chronic conditions (generic)	26	42	219	Champaloux & Young	2015	USA	1	6795	Attainment & grade retention	1	Asthma and cancer/diabetes/epilepsy (as one var) were associated with not completing HS after adjusting for confounders. Asthma: OR 1.63 (,.31, 2.02); CDE: 1.96 (1.13, 3.37). When adjusting for absence, these were 1.66 (1.33, 2.07) and 1.82 (0.99, 3.35), respectively, thus no evidence of mediation. Heart conditions and other conditions were not associated and ORs did not differ much when further …
13	Mckinley Yoder & Cantrell	2019	Chronic conditions (generic)	26	42	220	Drake et al	2010	USA	1	7842	Attainment	0	NA
13	Mckinley Yoder & Cantrell	2019	Chronic conditions (generic)	26	42	221	Duquette et al	2007	USA	0	71	Grade retention	0	NA
13	Mckinley Yoder & Cantrell	2019	Chronic conditions (generic)	26	42	222	Fletcher	2008	USA	1	13000	Attainment	0	NA
13	Mckinley Yoder & Cantrell	2019	Chronic conditions (generic)	26	42	223	Gilmour et al	2010	USA	0	823	Grade retention	0	NA
13	Mckinley Yoder & Cantrell	2019	Chronic conditions (generic)	26	42	224	Hansen et al	1999	USA	0	36	Attainment	0	NA
13	Mckinley Yoder & Cantrell	2019	Chronic conditions (generic)	26	42	225	Huberty et al	1992	USA	1	136	Grade retention	0	NA
13	Mckinley Yoder & Cantrell	2019	Chronic conditions (generic)	26	42	226	Kennard et al	1999	USA	0	50	Grade retention	0	NA
13	Mckinley Yoder & Cantrell	2019	Chronic conditions (generic)	26	42	227	Mackner et al	2012	USA	0	92	Grade retention	0	NA
13	Mckinley Yoder & Cantrell	2019	Chronic conditions (generic)	26	42	228	Maslow et al	2011	USA	1	13431	Attainment & grade retention	0	NA
13	Mckinley Yoder & Cantrell	2019	Chronic conditions (generic)	26	42	229	McCarthey et al	2002	USA	0	563	Grade retention	0	NA
13	Mckinley Yoder & Cantrell	2019	Chronic conditions (generic)	26	42	230	McLeod & Kaiser	2004	USA	1	424	Attainment & grade retention	0	NA
13	Mckinley Yoder & Cantrell	2019	Chronic conditions (generic)	26	42	231	McLeod et al	2012	USA	1	6315	Attainment	0	NA
13	Mckinley Yoder & Cantrell	2019	Chronic conditions (generic)	26	42	232	Murphy et al	2002	USA	0	160	Attainment	0	NA
13	Mckinley Yoder & Cantrell	2019	Chronic conditions (generic)	26	42	233	Reuben & Pastor	2013	USA	1	59440	Grade retention	0	NA
13	Mckinley Yoder & Cantrell	2019	Chronic conditions (generic)	26	42	234	Richard & Burlew	1997	USA	0	68	Grade retention	0	NA
13	Mckinley Yoder & Cantrell	2019	Chronic conditions (generic)	26	42	235	Rojewski	1999	USA	1	11178	Attainment	0	NA
13	Mckinley Yoder & Cantrell	2019	Chronic conditions (generic)	26	42	236	Schifter	2011	USA	1	11500	Attainment	0	NA
13	Mckinley Yoder & Cantrell	2019	Chronic conditions (generic)	26	42	237	Schifter	2016	USA	1	36507	Attainment	0	NA
13	Mckinley Yoder & Cantrell	2019	Chronic conditions (generic)	26	42	238	Shandra & Hogan	2009	USA	1	2239	Attainment & grade retention	0	NA
13	Mckinley Yoder & Cantrell	2019	Chronic conditions (generic)	26	42	239	Sorensen et al	2011	USA	0	144	Grade retention	0	NA
13	Mckinley Yoder & Cantrell	2019	Chronic conditions (generic)	26	42	240	Wisk & Weitzman	2017	USA	1	2255	Attainment	0	NA
13	Mckinley Yoder & Cantrell	2019	Chronic conditions (generic)	26	42	241	Zablocki & Krezmien	2013	USA	1	5928	Attainment & grade retention	0	NA
15	Milton et al (asthma)	2004	Asthma	12	29	254	Anderson et al	1983	UK	1	284	Standardised tests	0	NA
15	Milton et al (asthma)	2004	Asthma	12	29	257	Austin et al	1999	USA	0	108	Standardised tests	0	NA
15	Milton et al (asthma)	2004	Asthma	12	29	262	Fowler et al	1992	USA	1	10362	Grade retention	0	NA
15	Milton et al (asthma)	2004	Asthma	12	29	264	Guststadt et al	1989	USA	0	99	Standardised tests	0	NA
15	Milton et al (asthma)	2004	Asthma	12	29	258	Lindgren et al	1992	USA	0	356	Standardised tests	0	NA
15	Milton et al (asthma)	2004	Asthma	12	29	261	O'Neil et al	1985	USA	1	4036	School grades	0	NA
15	Milton et al (asthma)	2004	Asthma	12	29	259	Padur et al	1995	USA	0	50	School grades	0	NA
15	Milton et al (asthma)	2004	Asthma	12	29	256	Peckham & Butler	1978	UK	1	13509	Standardised tests	0	NA
15	Milton et al (asthma)	2004	Asthma	12	29	255	Rietveld & Colland	1999	Netherlands	0	50	School grades	0	NA
15	Milton et al (asthma)	2004	Asthma	12	29	253	Ross et al	1992	UK	1	261	School grades	0	NA
15	Milton et al (asthma)	2004	Asthma	12	29	263	Silva et al	1987	New Zealand	1	813	Standardised tests	0	NA
15	Milton et al (asthma)	2004	Asthma	12	29	260	Silverstein et al	2001	USA	1	184	Standardised tests	0	NA
14	Milton et al (diabetes)	2006	Type 1 diabetes	11	20	248	Crawford et al	1995	Canada	0	54	Standardised tests	0	NA
14	Milton et al (diabetes)	2006	Type 1 diabetes	11	20	244	Gath et al	1980	UK	0	152	School grades	0	NA
14	Milton et al (diabetes)	2006	Type 1 diabetes	11	20	247	Hagen et al	1990	USA	0	60	Standardised tests	0	NA
14	Milton et al (diabetes)	2006	Type 1 diabetes	11	20	250	Lloyd et al	1992	UK	0	80	Attainment	0	NA
14	Milton et al (diabetes)	2006	Type 1 diabetes	11	20	243	McCarthy et al	2002	USA	0	563	Standardised tests	0	NA
14	Milton et al (diabetes)	2006	Type 1 diabetes	11	20	249	Overstreet et al	1997	USA	0	116	Standardised tests	0	NA
14	Milton et al (diabetes)	2006	Type 1 diabetes	11	20	251	Robinson et al	1993	UK	0	371	School grades	0	NA
14	Milton et al (diabetes)	2006	Type 1 diabetes	11	20	242	Rovet et al	1990	Canada	0	103	Standardised tests	0	NA
14	Milton et al (diabetes)	2006	Type 1 diabetes	11	20	246	Rovet et al	1988	Canada	0	81	Standardised tests	0	NA
14	Milton et al (diabetes)	2006	Type 1 diabetes	11	20	245	Ryan et al	1985	USA	0	208	Standardised tests	0	NA
14	Milton et al (diabetes)	2006	Type 1 diabetes	11	20	252	Songer et al	1989	USA	0	316	Attainment	0	NA
16	Molcho et al	2019	Survivors of childhood cancer	14	14	272	Boman et al	2009	Sweden	1	1527	Attainment	0	NA
16	Molcho et al	2019	Survivors of childhood cancer	14	14	273	Boman et al	2010	Sweden	1	1457805	Attainment	0	NA
16	Molcho et al	2019	Survivors of childhood cancer	14	14	266	Dieluweit et al	2011	Germany	1	1670	Attainment	0	NA
16	Molcho et al	2019	Survivors of childhood cancer	14	14	265	Dumas et al	2016	France	0	2066	Attainment	0	NA
16	Molcho et al	2019	Survivors of childhood cancer	14	14	277	Gerhadt et al	2007	USA	0	646	Attainment	0	NA
16	Molcho et al	2019	Survivors of childhood cancer	14	14	270	Ghaderi et al	2015	Norway	1	1214836	Attainment	0	NA
16	Molcho et al	2019	Survivors of childhood cancer	14	14	278	Jacola et al	2016	USA	0	950	Attainment	0	NA
16	Molcho et al	2019	Survivors of childhood cancer	14	14	271	Jóhannsdóttir et al	2010	Scandinavia	1	2061	Attainment	0	NA
16	Molcho et al	2019	Survivors of childhood cancer	14	14	275	Kuehni et al	2012	Switzerland	1	6168	Attainment	0	NA
16	Molcho et al	2019	Survivors of childhood cancer	14	14	274	Löf et al	2011	Sweden	0	2231	Attainment	0	NA
16	Molcho et al	2019	Survivors of childhood cancer	14	14	268	Nies et al	2017	Netherlands	1	547	Attainment	0	NA
16	Molcho et al	2019	Survivors of childhood cancer	14	14	269	Stam et al	2005	Netherlands	0	861	Attainment	0	NA
16	Molcho et al	2019	Survivors of childhood cancer	14	14	276	Yagci-Kupeli et al	2013	Turkey	0	201	Attainment	0	NA
16	Molcho et al	2019	Survivors of childhood cancer	14	14	267	Zynda et al	2012	Germany	1	15048	Attainment	0	NA
17	Moser et al	2013	Cystic fibrosis, haemophilia A, end-stage renal disease and end-stage liver disease	9	21	281	Colegrove & Huntzinger	1994	USA	0	37	Standardised tests	0	NA	Absence associated with most teacher ratings but no mediation tested. Ref 14 in paper
17	Moser et al	2013	Cystic fibrosis, haemophilia A, end-stage renal disease and end-stage liver disease	9	21	285	Davis et al	1990	USA	0	24	Standardised tests & school grades	0	NA	Ref 23 in paper
17	Moser et al	2013	Cystic fibrosis, haemophilia A, end-stage renal disease and end-stage liver disease	9	21	286	Gilmour et al	2009	Canada	0	30	Standardised tests	0	NA	Ref 31 in paper
17	Moser et al	2013	Cystic fibrosis, haemophilia A, end-stage renal disease and end-stage liver disease	9	21	279	Grieve et al	2011	USA	0	40	Standardised tests & school grades	0	NA	Absence was associated with lower GPA but on standardised tests did not differ from population norms and performed well on GPA. Ref 9 in paper
17	Moser et al	2013	Cystic fibrosis, haemophilia A, end-stage renal disease and end-stage liver disease	9	21	282	Loveland et al	1994	USA	0	126	Standardised tests	0	NA	Ref 15 in paper
17	Moser et al	2013	Cystic fibrosis, haemophilia A, end-stage renal disease and end-stage liver disease	9	21	284	Shapiro et al	2001	USA	0	131	Standardised tests	0	NA	High number of bleeds associated with more absence, also associated with lower scores on maths and total achievement; mediatio not tested. Ref 17 in paper
17	Moser et al	2013	Cystic fibrosis, haemophilia A, end-stage renal disease and end-stage liver disease	9	21	287	Sorensen et al	2011	USA	0	144	Standardised tests	0	NA	Ref 32 in paper
17	Moser et al	2013	Cystic fibrosis, haemophilia A, end-stage renal disease and end-stage liver disease	9	21	283	Usner et al	1998	USA	0	333	Standardised tests	0	NA	Ref 4 in paper
17	Moser et al	2013	Cystic fibrosis, haemophilia A, end-stage renal disease and end-stage liver disease	9	21	280	Woolf et al	1989	USA	0	22	Standardised tests & school grades	0	NA	6/22 performed more than 2 grades below exp in reading; 10/22 in maths. School underachievement did not correlate with absenteeism or GPA. Ref 12 in paper
18	Oakley et al	2020	Type 1 diabetes	2	2	289	Dahlquist & Källén	2007	Sweden	1	1336127	School grades	0	NA
18	Oakley et al	2020	Type 1 diabetes	2	2	288	Persson et al	2013	Sweden	1	11955	School grades	0	NA
20	Polderman et al	2010	Attention problems including ADHD	15	16	290	Barkley et al	2006	USA	0	225	School grades and attainment	0	NA
20	Polderman et al	2010	Attention problems including ADHD	15	16	291	Biederman et al	1996	USA	0	237	Standardised tests & retention	0	NA
20	Polderman et al	2010	Attention problems including ADHD	15	16	292	Breslau et al	2009	USA	1	693	Standardised tests	0	NA
20	Polderman et al	2010	Attention problems including ADHD	15	16	293	Currie & Stabile	2006	USA & Canada	1	7548	Standardised tests & retention	0	NA
20	Polderman et al	2010	Attention problems including ADHD	15	16	294	Duncan et al	2007	USA, UK & Canada	1	34837	Standardised tests	0	NA
20	Polderman et al	2010	Attention problems including ADHD	15	16	295	Fisher	1993	USA	0	160	Standardised tests	0	NA
20	Polderman et al	2010	Attention problems including ADHD	15	16	296	Flouri	2007	UK	1	6522	Attainment	0	NA
20	Polderman et al	2010	Attention problems including ADHD	15	16	297	Howell et al	1985	USA	1	319	Attainment	0	NA
20	Polderman et al	2010	Attention problems including ADHD	15	16	298	Lambert	1988	USA	0	301	Attainment	0	NA
20	Polderman et al	2010	Attention problems including ADHD	15	16	299	Latimer et al	2003	USA	1	174	Standardised tests	0	NA
20	Polderman et al	2010	Attention problems including ADHD	15	16	300	Lee & Hinshaw	2006	USA	0	209	Standardised tests	0	NA
20	Polderman et al	2010	Attention problems including ADHD	15	16	301	Mannuzza et al	2002	USA	0	410	Attainment	0	NA
20	Polderman et al	2010	Attention problems including ADHD	15	16	302	Massetti et al	2008	USA	0	255	Attainment	0	NA
20	Polderman et al	2010	Attention problems including ADHD	15	16	303	McCormick	2004	USA	0	73	Standardised tests	0	NA
20	Polderman et al	2010	Attention problems including ADHD	15	16	304	Merrell & Tymms	2001	UK	1	4148	Standardised tests & attainment	0	NA
21	Puka et al	2019	Epilepsy	18	45	305	Baca et al 2017	2017	USA	1	333	Attainment	0	NA
21	Puka et al	2019	Epilepsy	18	45	306	Camfield et al	2016	Canada	1	291	Attainment	0	NA
21	Puka et al	2019	Epilepsy	18	45	307	Chin et al	2011	UK	1	65	Attainment	0	NA
21	Puka et al	2019	Epilepsy	18	45	308	Ehrstedt et al	2017	Sweden	0	20	Attainment	0	NA
21	Puka et al	2019	Epilepsy	18	45	309	Holtkamp et al	2014	Germany	0	75	Attainment	0	NA
21	Puka et al	2019	Epilepsy	18	45	310	Jalava et al	1997	Finland	1	95	Attainment	0	NA
21	Puka et al	2019	Epilepsy	18	45	311	Jennum et al	2016	Denmark	1	11400	Attainment	0	NA
21	Puka et al	2019	Epilepsy	18	45	312	Kokkonen et al	1997	Finland	1	81	Attainment	0	NA
21	Puka et al	2019	Epilepsy	18	45	313	Lach et al	2010	Canada	0	71	Attainment	0	NA
21	Puka et al	2019	Epilepsy	18	45	314	Puka & Smith	2016	Canada	0	78	Attainment	0	NA
21	Puka et al	2019	Epilepsy	18	45	315	Schneider-von Podweils et al	2014	Germany	1	30	Attainment	0	NA
21	Puka et al	2019	Epilepsy	18	45	316	Shackleton et al	2003	Netherlands	0	164	Attainment	0	NA
21	Puka et al	2019	Epilepsy	18	45	317	Sillanpää	1990	Finland	1	171	Attainment	0	NA
21	Puka et al	2019	Epilepsy	18	45	318	Syvertsen et al	2014	Norway	0	37	Attainment	0	NA
21	Puka et al	2019	Epilepsy	18	45	319	Szabo et al	2001	USA	0	16	Attainment	0	NA
21	Puka et al	2019	Epilepsy	18	45	320	Wakamoto et al	2000	Japan	1	148	Attainment	0	NA
21	Puka et al	2019	Epilepsy	18	45	321	Wilson et al	2012	Australia	1	34	Attainment	0	NA
21	Puka et al	2019	Epilepsy	18	45	322	Wirrell et al	1997	Canada	1	55	Attainment	0	NA
22	Ragnarsson et al	2020	Chronic pain	21	21	323	Arruda & Bigal	2012	Brazil	1	5671	School grades	0	NA
22	Ragnarsson et al	2020	Chronic pain	21	21	324	Bakoula et al	2006	Greece	1	8130	School grades	0	NA
22	Ragnarsson et al	2020	Chronic pain	21	21	325	Balague et al	1994	Switzerland	1	1716	School grades	0	NA
22	Ragnarsson et al	2020	Chronic pain	21	21	326	Boey & Yap	1999	Malaysia	1	148	School grades	0	NA
22	Ragnarsson et al	2020	Chronic pain	21	21	327	Boey et al	2003	Malaysia	1	1971	Perceived achievement	0	NA
22	Ragnarsson et al	2020	Chronic pain	21	21	328	Campo et al	2002	USA & Canada	1	21065	School grades	0	NA
22	Ragnarsson et al	2020	Chronic pain	21	21	329	Devanarayana et al	2008	Sri Lanka	1	734	School grades	0	NA
22	Ragnarsson et al	2020	Chronic pain	21	21	330	Durmaz et al	2013	Turkey	1	244	School grades	0	NA
22	Ragnarsson et al	2020	Chronic pain	21	21	331	Eryilmaz et al	2010	Turkey	1	1951	Perceived achievement	0	NA
22	Ragnarsson et al	2020	Chronic pain	21	21	332	Ho et al	2009	Canada	0	57	Standardised tests	0	NA
22	Ragnarsson et al	2020	Chronic pain	21	21	333	Kashikar et al	2007	USA	0	110	Perceived achievement	0	NA
22	Ragnarsson et al	2020	Chronic pain	21	21	334	Low Kapalu et al	2018	USA	0	93	Standardised tests	0	NA
22	Ragnarsson et al	2020	Chronic pain	21	21	335	Metsahonkala et al	1998	Finland	1	3489	Perceived achievement	0	NA
22	Ragnarsson et al	2020	Chronic pain	21	21	336	Modin et al	2015	Finland & Sweden	1	13108	Perceived achievement	0	NA
22	Ragnarsson et al	2020	Chronic pain	21	21	337	Pecor et al	2016	USA	1	633	Perceived achievement	0	NA
22	Ragnarsson et al	2020	Chronic pain	21	21	338	Rocha-Filho & Santos	2014	Brazil	1	192	School grades	0	NA
22	Ragnarsson et al	2020	Chronic pain	21	21	339	Sabia & Rees	2011	USA	1	9000	School grades	0	Using data on 7,147 to 8,803 young people (depending on analysis) from the US National Longitudinal Study of Adolescent Health examined the association between "suffering from migraine" at baseline (ages 11-22) and educational attainment, measured both as high school grade point average and probability of high school graduation, at wave 3 (ages 18 to 28). After controlling for parental education,…
22	Ragnarsson et al	2020	Chronic pain	21	21	340	Santinello et al	2009	Italy	1	4386	Perceived achievement	0	NA
22	Ragnarsson et al	2020	Chronic pain	21	21	341	Shehab & Al-Jarallah	2005	Kuwait	1	400	School grades	0	NA
22	Ragnarsson et al	2020	Chronic pain	21	21	342	Vervoort et al	2014	Belgium	1	10650	Perceived achievement	0	NA
22	Ragnarsson et al	2020	Chronic pain	21	21	343	Waldie & Welch	2007	New Zeland	1	971	School grades & attainment	0	NA
23	Saatci et al	2020	Survivors of childhood cancer	12	26	344	Ahomaki et al	2016	Finland	1	19456	Attainment	0	NA
23	Saatci et al	2020	Survivors of childhood cancer	12	26	345	Allen et al	1990	UK	1	74	Attainment	0	NA
23	Saatci et al	2020	Survivors of childhood cancer	12	26	346	Boman et al	2010	Sweden	1	1457805	Attainment	0	NA
23	Saatci et al	2020	Survivors of childhood cancer	12	26	347	Haupt et al	1994	USA & Canada	0	1002	Attainment	0	NA
23	Saatci et al	2020	Survivors of childhood cancer	12	26	348	Hudson et al	2003	USA	1	12451	Attainment	0	NA
23	Saatci et al	2020	Survivors of childhood cancer	12	26	349	Ishida et al	2011	Japan	0	261	Attainment	0	NA
23	Saatci et al	2020	Survivors of childhood cancer	12	26	350	Kuehni et al	2012	Switzerland	1	6168	Attainment	0	NA
23	Saatci et al	2020	Survivors of childhood cancer	12	26	351	Lancashire et al	2010	UK	1	10488	Attainment	0	NA
23	Saatci et al	2020	Survivors of childhood cancer	12	26	352	Langeveld et al	2003	Netherlands	1	1592	Attainment	0	NA
23	Saatci et al	2020	Survivors of childhood cancer	12	26	353	Maule et al	2016	Italy	1	520	Attainment	0	NA
23	Saatci et al	2020	Survivors of childhood cancer	12	26	354	Moe et al	1997	Norway	1	98	Attainment	0	NA
23	Saatci et al	2020	Survivors of childhood cancer	12	26	355	Ness et al	2005	USA	0	628	Attainment	0	NA
24	Santana et al	2017	Obesity	34	34	356	Abdelalim et al	2011	Kuwait	1	1066	School grades	0	NA
24	Santana et al	2017	Obesity	34	34	357	Barrigas & Fragoso	2012	Portugal	1	792	School grades	0	NA
24	Santana et al	2017	Obesity	34	34	358	Baxter et al	2011	Colombia	1	920	Standardised tests	0	NA
24	Santana et al	2017	Obesity	34	34	359	Baxter et al	2013	Colombia	1	1504	Standardised tests	0	NA
24	Santana et al	2017	Obesity	34	34	360	Bisset et al	2013	Canada	1	1959	Standardised tests	0	NA
24	Santana et al	2017	Obesity	34	34	361	Booth et al	2014	UK	1	4260	School grades	0	NA
24	Santana et al	2017	Obesity	34	34	362	Carter et al	2010	Canada	1	2582	Standardised tests	0	NA
24	Santana et al	2017	Obesity	34	34	363	Chen et al	2012	Taiwan	1	409	School grades	0	NA
24	Santana et al	2017	Obesity	34	34	364	Clark & Slate	2009	USA	1	9471	Standardised tests & school grades	0	NA
24	Santana et al	2017	Obesity	34	34	365	Cottrell et al	2007	USA	1	968	Standardised tests	0	NA
24	Santana et al	2017	Obesity	34	34	366	Datar & Sturm	2006	USA	1	7000	Standardised tests	0	NA
24	Santana et al	2017	Obesity	34	34	367	Datar et al	2004	USA	1	1112	Standardised tests	0	NA
24	Santana et al	2017	Obesity	34	34	368	Eide et al	2010	USA	1	2908	Standardised tests	0	NA
24	Santana et al	2017	Obesity	34	34	369	Gable et al	2012	USA	1	6680	Standardised tests	0	NA
24	Santana et al	2017	Obesity	34	34	370	Gurley-Calvez & Higginbotham	2010	USA	1	2010	Standardised tests	0	NA
24	Santana et al	2017	Obesity	34	34	371	Harrington	2013	USA	1	2013	Standardised tests	0	NA
24	Santana et al	2017	Obesity	34	34	372	Heshmat et al	2014	Iran	1	69	School grades	0	NA
24	Santana et al	2017	Obesity	34	34	373	Huang et al	2015	Denmark	1	525	Standardised tests	0	NA
24	Santana et al	2017	Obesity	34	34	374	Judge & Jahns	2007	USA	1	13680	Standardised tests	0	NA
24	Santana et al	2017	Obesity	34	34	375	Kaestner & Grossman	2009	USA	1	2500	Standardised tests	0	NA
24	Santana et al	2017	Obesity	34	34	376	Kamijo et al	2012	USA	1	126	Standardised tests	0	NA
24	Santana et al	2017	Obesity	34	34	377	Kang et al	2016	Korea	1	1652	School grades	0	NA
24	Santana et al	2017	Obesity	34	34	378	Kantomaa et al	2013	Finland	1	8061	School grades	0	NA
24	Santana et al	2017	Obesity	34	34	379	LeBlanc et al	2012	USA	1	1963	School grades	0	NA
24	Santana et al	2017	Obesity	34	34	380	Morita et al	2016	Japan	1	315	School grades	0	NA
24	Santana et al	2017	Obesity	34	34	381	Olivares and García-Rubio	2016	Chile	1	18746	Standardised tests	0	NA
24	Santana et al	2017	Obesity	34	34	382	Ramaswamay et al	2010	USA	1	45	Teacher-reported effort score	0	NA
24	Santana et al	2017	Obesity	34	34	383	Roberts et al	2010	USA	1	1989	Standardised tests	0	NA
24	Santana et al	2017	Obesity	34	34	384	Shore et al	2008	USA	1	566	School grades	0	NA
24	Santana et al	2017	Obesity	34	34	385	Tonetti et al	2015	Italy	1	37	School grades	0	NA
24	Santana et al	2017	Obesity	34	34	386	Torrijos-Niño et al	2014	Spain	1	893	School grades	0	NA
24	Santana et al	2017	Obesity	34	34	387	Veldwijk et al	2012	Netherlands	1	1543	Standardised tests	1	Overweight at 12 years of age was associated with school performance, measured as a standardised test. After adjusting for parental education, skipping breakfast and screen time, overweight was associated with a 0.16 reduction in test scores (95% CI -0.32, 0.00). Further adjustments as follows did not significantly attenuate this coefficient: being bullied (-0.13 [-0.29, 0.03]), mental health inv…
24	Santana et al	2017	Obesity	34	34	388	Yau et al	2014	Netherlands	0	60	Standardised tests	0	NA
24	Santana et al	2017	Obesity	34	34	389	Zavodny	2013	USA	1	15795	Standardised tests	0	NA
25	Schneider	2020	Asthma	10	20	390	Champaloux & Young	2015	USA	1	6795	Attainment	1	Is included in another review. Asthma and cancer/diabetes/epilepsy (as one var) were associated with not completing HS after adjusting for confounders. Asthma: OR 1.63 (1.31, 2.02); CDE: 1.96 (1.13, 3.37). When adjusting for absence, these were 1.66 (1.33, 2.07) and 1.82 (0.99, 3.35), respectively, thus no evidence of mediation. Heart conditions and other conditions were not associated and ORs di…
25	Schneider	2020	Asthma	10	20	398	Clark et al	2010	USA	1	6872	Standardised tests	0	NA
25	Schneider	2020	Asthma	10	20	391	Crump et al	2013	USA	1	22730	School grades	1	The odds of achieving "basic or below" on California standard tests were 1.45 times higher (95% CI 1.36, 1.56) among those with any CHC. When adjusting for sociodemographic factors the OR was attenuated to 1.25 (1.16, 1.36). When further adjusting for number of school absences, there was a negligible change in the OR to 1.22 (1.12, 1.32) indicating no mediation via absence.
25	Schneider	2020	Asthma	10	20	399	Engelke et al	2008	USA	0	114	School grades	0	NA
25	Schneider	2020	Asthma	10	20	392	Kohen	2010	Canada	1	4616	Standardised tests	1	When adjusting for age, gender and family characteristics, the odds of achieving low scores on standardised tests were higher among children with asthma (low severity: OR 1.39 [1.00, 1.92]; moderate 1.62 [1.17, 2.25]; severe: 1.62 [1.17, 2.25]) and those with other chronic conditions (1.75 [1.43, 2.14]). When further adjusting for days absent from school, these ORs were attenuated only minimally …
25	Schneider	2020	Asthma	10	20	393	Krenitsky-Korn	2011	USA	1	57	School grades	0	NA
25	Schneider	2020	Asthma	10	20	394	Maslow et al	2011	USA	1	13236	Attainment	0	NA
25	Schneider	2020	Asthma	10	20	395	Moonie et al	2010	USA	1	300881	School grades	0	NA
25	Schneider	2020	Asthma	10	20	396	Moonie et al	2008	USA	1	3812	Standardised tests	0	NA
25	Schneider	2020	Asthma	10	20	397	Silverstein et al	2001	USA	1	184	Attainment	0	NA
26	Schulte et al	2019	CNS tumors	4	45	400	Ahomaki et al	2017	Finland	1	4852	Attainment	0	NA
26	Schulte et al	2019	CNS tumors	4	45	401	Ghaderi et al	2016	Norway	1	121530	Attainment	0	NA
26	Schulte et al	2019	CNS tumors	4	45	402	Hornquist et al	2015	Sweden	1	1523	Attainment	0	NA
26	Schulte et al	2019	CNS tumors	4	45	403	Kuehni et al	2012	Switzerland	0	5317	Attainment	0	NA
27	Segal et al	2021	Obesity	18	19	404	Afzal & Gortmaker	2015	USA	1	1991	Standardised tests	0	NA
27	Segal et al	2021	Obesity	18	19	405	Averett & Stifel	2010	USA	1	12000	Standardised tests	0	NA
27	Segal et al	2021	Obesity	18	19	406	Bisset et al	2013	Canada	1	1959	Standardised tests	0	NA
27	Segal et al	2021	Obesity	18	19	407	Black et al	2015	Australia	1	4983	Standardised tests	1	For both literracy and mathematics scores, obesity was associated with lower achievement across a range of model specifications, including adjusting for confounders. Further adjusting for being often or always absent in the previous month because of not feeling well did not change the coefficient estimates, thus indicating that illness-related school absence was not likely a mediator.
27	Segal et al	2021	Obesity	18	19	408	Capogrossi & You	2013	USA	1	21260	Standardised tests	0	NA
27	Segal et al	2021	Obesity	18	19	409	Chen et al	2012	Taiwan	1	409	Standardised tests	0	NA
27	Segal et al	2021	Obesity	18	19	410	Ding et al	2009	USA	1	893	School grades	0	NA
27	Segal et al	2021	Obesity	18	19	411	Fletcher & Lehrer	2011	USA	1	1684	Standardised tests & school grades	0	NA
27	Segal et al	2021	Obesity	18	19	412	Kaestner & Grossman	2009	USA	1	2200	Standardised tests & school grades	0	NA
27	Segal et al	2021	Obesity	18	19	413	Kenney et al	2015	USA	1	3362	Standardised tests	0	NA
27	Segal et al	2021	Obesity	18	19	414	Kranjac	2015	USA	1	5072	Standardised tests	0	NA
27	Segal et al	2021	Obesity	18	19	415	Lu et al	2014	Taiwan	1	8690	Standardised tests	0	NA
27	Segal et al	2021	Obesity	18	19	416	Okunade et al	2009	USA	1	8388	Attainment	0	NA
27	Segal et al	2021	Obesity	18	19	417	Sabia	2007	USA	1	5129	School grades	1	Among white females, obesity was associated with lower academic performance after adjusting for a number of covariates. Further adjusting for absence made no difference.
27	Segal et al	2021	Obesity	18	19	418	Sabia & Rees	2015	USA	1	11822	School grades	0	NA
27	Segal et al	2021	Obesity	18	19	419	Shi & Li	2018	Australia	1	5000	Standardised tests	0	NA
27	Segal et al	2021	Obesity	18	19	420	von Hinke et al	2012	UK	1	3001	School grades	0	NA
27	Segal et al	2021	Obesity	18	19	421	von Hinke et al	2016	UK	1	4844	School grades	0	NA
28	Wickersham et al	2021	Depression	31	31	422	Birchwood and Daley 2012	2012	UK	1	324	School grades	0	NA	In meta-analysis
28	Wickersham et al	2021	Depression	31	31	425	Chen & Chen	2019	China	1	1430	School grades	0	NA	In meta-analysis
28	Wickersham et al	2021	Depression	31	31	423	Chen & Li	2000	China	1	431	School grades	0	NA	In meta-analysis
28	Wickersham et al	2021	Depression	31	31	424	Chen et al	2013	China	1	1155	School grades	0	NA	In meta-analysis
28	Wickersham et al	2021	Depression	31	31	426	Da Fonseca et al	2009	France	1	353	School grades	0	NA	In meta-analysis
28	Wickersham et al	2021	Depression	31	31	427	Davies et al	2018	UK	1	4398	School grades	0	NA
28	Wickersham et al	2021	Depression	31	31	428	Denault et al	2009	Canada	1	362	School grades	0	NA	In meta-analysis
28	Wickersham et al	2021	Depression	31	31	429	Fu et al	2018	China	1	336	School grades	0	NA	In meta-analysis
28	Wickersham et al	2021	Depression	31	31	430	Hood et al	2017	Australia	1	244	School grades	0	NA	In meta-analysis
28	Wickersham et al	2021	Depression	31	31	431	Ialongo et al	2001	USA	1	625	School grades	0	NA
28	Wickersham et al	2021	Depression	31	31	432	Jonsson et al	2010	Sweden	1	588	School grades	0	NA
28	Wickersham et al	2021	Depression	31	31	433	Kim et al	2013	USA	1	379	School grades	0	NA	In meta-analysis
28	Wickersham et al	2021	Depression	31	31	434	Kim et al	2015	USA	1	350	School grades	0	NA	In meta-analysis
28	Wickersham et al	2021	Depression	31	31	435	Kingery et al	2011	USA	1	365	School grades	0	NA	In meta-analysis
28	Wickersham et al	2021	Depression	31	31	436	Lepore & Kliewer	2013	USA	1	498	School grades	0	NA	In meta-analysis
28	Wickersham et al	2021	Depression	31	31	437	Liu et al	2018	China	1	945	School grades	0	NA	In meta-analysis
28	Wickersham et al	2021	Depression	31	31	438	Luthar	1995	USA	1	138	School grades	0	NA	In meta-analysis
28	Wickersham et al	2021	Depression	31	31	439	McLeod et al	2012	USA	1	4701	School grades	0	NA
28	Wickersham et al	2021	Depression	31	31	440	Morales et Guerra	2006	USA	1	2745	Standardised tests	0	NA	In meta-analysis
28	Wickersham et al	2021	Depression	31	31	441	Nishina et al	2005	USA	1	1526	School grades	0	NA	In meta-analysis
28	Wickersham et al	2021	Depression	31	31	442	Pate et al	2017	USA	1	7276	School grades	0	NA	In meta-analysis
28	Wickersham et al	2021	Depression	31	31	443	Riglin et al	2013	UK	1	202	School grades	0	NA	In meta-analysis
28	Wickersham et al	2021	Depression	31	31	444	Rockhill et al	2009	USA	1	521	School grades	0	NA
28	Wickersham et al	2021	Depression	31	31	445	Rothon et al	2009	UK	1	1636	School grades	0	NA
28	Wickersham et al	2021	Depression	31	31	446	Rothon et al	2011	UK	1	2499	School grades	0	NA
28	Wickersham et al	2021	Depression	31	31	447	Schwartz et al	2005	USA	1	199	School grades	0	NA
28	Wickersham et al	2021	Depression	31	31	448	Shahar et al	2006	USA	1	460	School grades	0	NA	In meta-analysis
28	Wickersham et al	2021	Depression	31	31	449	Steele et al	2000	USA	1	129	School grades	0	NA	In meta-analysis
28	Wickersham et al	2021	Depression	31	31	450	Wang & Sheikh-Khalil	2014	USA	1	935	School grades	0	NA
28	Wickersham et al	2021	Depression	31	31	451	Weidman et al	2015	USA	1	130	School grades	0	NA	In meta-analysis
28	Wickersham et al	2021	Depression	31	31	452	Zhang et al	2019	China	1	648	School grades	0	NA	In meta-analysis
29	Wo et al	2017	Epilepsy	20	20	453	Aldenkamp et al	2005	Netherlands	0	176	Standardised tests	0	NA
29	Wo et al	2017	Epilepsy	20	20	454	Austin et al	1998	USA	0	225	Standardised tests	0	NA
29	Wo et al	2017	Epilepsy	20	20	469	Austin et al	1999	USA	0	194	Standardised tests	0	NA
29	Wo et al	2017	Epilepsy	20	20	470	Bailet & Turk	2000	USA	0	113	Standardised tests	0	NA
29	Wo et al	2017	Epilepsy	20	20	455	Braakman et al	2012	Netherlands	0	50	Standardised tests	0	NA
29	Wo et al	2017	Epilepsy	20	20	456	Caplan et al	2006	USA	0	149	Standardised tests	0	NA
29	Wo et al	2017	Epilepsy	20	20	457	Chambers et al	2014	Jamaica	0	66	Standardised tests	0	NA
29	Wo et al	2017	Epilepsy	20	20	458	Drewel et al	2009	USA	0	173	Standardised tests	0	NA
29	Wo et al	2017	Epilepsy	20	20	459	Gulgonen et al	2000	Turkey	0	42	Standardised tests	0	NA
29	Wo et al	2017	Epilepsy	20	20	471	Hermann et al	2008	USA	0	62	Standardised tests	0	NA
29	Wo et al	2017	Epilepsy	20	20	460	Jackson et al	2013	USA	0	166	Standardised tests	0	NA
29	Wo et al	2017	Epilepsy	20	20	472	Jones et al	2010	USA	0	82	Standardised tests	0	NA
29	Wo et al	2017	Epilepsy	20	20	461	Mitchell et al	1991	USA	0	78	Standardised tests	0	NA
29	Wo et al	2017	Epilepsy	20	20	462	Miziara et al	2012	Brazil	0	71	Standardised tests	0	NA
29	Wo et al	2017	Epilepsy	20	20	463	Overvliet et al	2011	Netherlands	0	48	Standardised tests	0	NA
29	Wo et al	2017	Epilepsy	20	20	464	Schoenfeld et al	1998	USA	0	84	Standardised tests	0	NA
29	Wo et al	2017	Epilepsy	20	20	465	Seidenberg et al	1986	USA	0	122	Standardised tests	0	NA
29	Wo et al	2017	Epilepsy	20	20	466	Tedrus et al	2009	Brazil	0	69	Standardised tests	0	NA
29	Wo et al	2017	Epilepsy	20	20	467	Williams et al	2001	USA	0	65	Standardised tests	0	NA
29	Wo et al	2017	Epilepsy	20	20	468	Williams et al	1996	USA	0	84	Standardised tests	0	NA

## Sheet: Deduplicated 441 studies
study_id	study_auth	review	study_year	Condition	Condition2	study_country	community_sample	sample_size	outcomes	absence_mediation_tested	absence_mediation_results	notes
254	Anderson et al	Milton et al	1983	Asthma	Asthma	UK	1	284	Standardised tests	0	NA
257	Austin et al	Milton et al	1999	Asthma	Asthma	USA	0	108	Standardised tests	0	NA
469	Austin et al	Wo et al	1999	Asthma	Asthma	USA	0	194	Standardised tests	0	NA
398	Clark et al	Schneider	2010	Asthma	Asthma	USA	1	6872	Standardised tests	0	NA
391	Crump et al	Schneider	2013	Asthma	Asthma	USA	1	22730	School grades	1	The odds of achieving "basic or below" on California standard tests were 1.45 times higher (95% CI 1.36, 1.56) among those with any CHC. When adjusting for sociodemographic factors the OR was attenuated to 1.25 (1.16, 1.36). When further adjusting for number of school absences, there was a negligible change in the OR to 1.22 (1.12, 1.32) indicating no mediation via absence.
399	Engelke et al	Schneider	2008	Asthma	Asthma	USA	0	114	School grades	0	NA
262	Fowler et al	Milton et al	1992	Asthma	Asthma	USA	1	10362	Grade retention	0	NA
264	Guststadt et al	Milton et al	1989	Asthma	Asthma	USA	0	99	Standardised tests	0	NA
392	Kohen	Schneider	2010	Asthma	Asthma	Canada	1	4616	Standardised tests	1	When adjusting for age, gender and family characteristics, the odds of achieving low scores on standardised tests were higher among children with asthma (low severity: OR 1.39 [1.00, 1.92]; moderate 1.62 [1.17, 2.25]; severe: 1.62 [1.17, 2.25]) and those with other chronic conditions (1.75 [1.43, 2.14]). When further adjusting for days absent from school, these ORs were attenuated only minimally …
393	Krenitsky-Korn	Schneider	2011	Asthma	Asthma	USA	1	57	School grades	0	NA
258	Lindgren et al	Milton et al	1992	Asthma	Asthma	USA	0	356	Standardised tests	0	NA
396	Moonie et al	Schneider	2008	Asthma	Asthma	USA	1	3812	Standardised tests	0	NA
395	Moonie et al	Schneider	2010	Asthma	Asthma	USA	1	300881	School grades	0	NA
261	O'Neil et al	Milton et al	1985	Asthma	Asthma	USA	1	4036	School grades	0	NA
259	Padur et al	Milton et al	1995	Asthma	Asthma	USA	0	50	School grades	0	NA
256	Peckham & Butler	Milton et al	1978	Asthma	Asthma	UK	1	13509	Standardised tests	0	NA
255	Rietveld & Colland	Milton et al	1999	Asthma	Asthma	Netherlands	0	50	School grades	0	NA
253	Ross et al	Milton et al	1992	Asthma	Asthma	UK	1	261	School grades	0	NA
263	Silva et al	Milton et al	1987	Asthma	Asthma	New Zealand	1	813	Standardised tests	0	NA
397	Silverstein et al	Schneider	2001	Asthma	Asthma	USA	1	184	Attainment	0	NA
290	Barkley et al	Polderman et al	2006	Attention problems including ADHD	Attention problems including ADHD	USA	0	225	School grades and attainment	0	NA
291	Biederman et al	Polderman et al	1996	Attention problems including ADHD	Attention problems including ADHD	USA	0	237	Standardised tests & retention	0	NA
292	Breslau et al	Polderman et al	2009	Attention problems including ADHD	Attention problems including ADHD	USA	1	693	Standardised tests	0	NA
293	Currie & Stabile	Polderman et al	2006	Attention problems including ADHD	Attention problems including ADHD	USA & Canada	1	7548	Standardised tests & retention	0	NA
294	Duncan et al	Polderman et al	2007	Attention problems including ADHD	Attention problems including ADHD	USA, UK & Canada	1	34837	Standardised tests	0	NA
295	Fisher	Polderman et al	1993	Attention problems including ADHD	Attention problems including ADHD	USA	0	160	Standardised tests	0	NA
296	Flouri	Polderman et al	2007	Attention problems including ADHD	Attention problems including ADHD	UK	1	6522	Attainment	0	NA
297	Howell et al	Polderman et al	1985	Attention problems including ADHD	Attention problems including ADHD	USA	1	319	Attainment	0	NA
298	Lambert	Polderman et al	1988	Attention problems including ADHD	Attention problems including ADHD	USA	0	301	Attainment	0	NA
299	Latimer et al	Polderman et al	2003	Attention problems including ADHD	Attention problems including ADHD	USA	1	174	Standardised tests	0	NA
300	Lee & Hinshaw	Polderman et al	2006	Attention problems including ADHD	Attention problems including ADHD	USA	0	209	Standardised tests	0	NA
301	Mannuzza et al	Polderman et al	2002	Attention problems including ADHD	Attention problems including ADHD	USA	0	410	Attainment	0	NA
302	Massetti et al	Polderman et al	2008	Attention problems including ADHD	Attention problems including ADHD	USA	0	255	Attainment	0	NA
303	McCormick	Polderman et al	2004	Attention problems including ADHD	Attention problems including ADHD	USA	0	73	Standardised tests	0	NA
304	Merrell & Tymms	Polderman et al	2001	Attention problems including ADHD	Attention problems including ADHD	UK	1	4148	Standardised tests & attainment	0	NA
216	Bailet & Turk	Mckinley Yoder & Cantrell	2000	Chronic conditions (generic)	Generic / multiple	USA	0	110	Grade retention	0	NA
470	Bailet & Turk	Wo et al	2000	Chronic conditions (generic)	Generic / multiple	USA	0	113	Standardised tests	0	NA
154	Best et al	Hale et al	2004	Chronic conditions (generic)	Generic / multiple	USA	0	130	Attainment	0	NA
155	Biederman et al	Hale et al	2010	Chronic conditions (generic)	Generic / multiple	USA	0	103	Attainment	0	NA
218	Breslau et al	Mckinley Yoder & Cantrell	2011	Chronic conditions (generic)	Generic / multiple	USA	1	29662	Attainment	0	NA
390	Champaloux & Young	Schneider	2015	Chronic conditions (generic)	Generic / multiple	USA	1	6795	Attainment	1	Asthma and cancer/diabetes/epilepsy (as one var) were associated with not completing HS after adjusting for confounders. Asthma: OR 1.63 (1.31, 2.02); CDE: 1.96 (1.13, 3.37). When adjusting for absence, these were 1.66 (1.33, 2.07) and 1.82 (0.99, 3.35), respectively, thus no evidence of mediation. Heart conditions and other conditions were not associated and ORs did not differ much when further …
220	Drake et al	Mckinley Yoder & Cantrell	2010	Chronic conditions (generic)	Generic / multiple	USA	1	7842	Attainment	0	NA
159	Galéra et al	Hale et al	2009	Chronic conditions (generic)	Generic / multiple	France	1	1264	Attainment	0	NA
160	Gerhardt et al	Hale et al	2008	Chronic conditions (generic)	Generic / multiple	USA	0	91	Attainment	0	NA
223	Gilmour et al	Mckinley Yoder & Cantrell	2010	Chronic conditions (generic)	Generic / multiple	USA	0	823	Grade retention	0	NA
162	Gortmaker et al	Hale et al	1993	Chronic conditions (generic)	Generic / multiple	USA	1	10485	Attainment	0	NA
225	Huberty et al	Mckinley Yoder & Cantrell	1992	Chronic conditions (generic)	Generic / multiple	USA	1	136	Grade retention	0	NA
226	Kennard et al	Mckinley Yoder & Cantrell	1999	Chronic conditions (generic)	Generic / multiple	USA	0	50	Grade retention	0	NA
227	Mackner et al	Mckinley Yoder & Cantrell	2012	Chronic conditions (generic)	Generic / multiple	USA	0	92	Grade retention	0	NA
228	Maslow et al	Mckinley Yoder & Cantrell	2011	Chronic conditions (generic)	Generic / multiple	USA	1	13431	Attainment & grade retention	0	NA
394	Maslow et al	Schneider	2011	Chronic conditions (generic)	Generic / multiple	USA	1	13236	Attainment	0	NA
229	McCarthey et al	Mckinley Yoder & Cantrell	2002	Chronic conditions (generic)	Generic / multiple	USA	0	563	Grade retention	0	NA
230	McLeod & Kaiser	Mckinley Yoder & Cantrell	2004	Chronic conditions (generic)	Generic / multiple	USA	1	424	Attainment & grade retention	0	NA
231	McLeod et al	Mckinley Yoder & Cantrell	2012	Chronic conditions (generic)	Generic / multiple	USA	1	6315	Attainment	0	NA
439	McLeod et al	Wickersham et al	2012	Chronic conditions (generic)	Generic / multiple	USA	1	4701	School grades	0	NA
232	Murphy et al	Mckinley Yoder & Cantrell	2002	Chronic conditions (generic)	Generic / multiple	USA	0	160	Attainment	0	NA
233	Reuben & Pastor	Mckinley Yoder & Cantrell	2013	Chronic conditions (generic)	Generic / multiple	USA	1	59440	Grade retention	0	NA
234	Richard & Burlew	Mckinley Yoder & Cantrell	1997	Chronic conditions (generic)	Generic / multiple	USA	0	68	Grade retention	0	NA
235	Rojewski	Mckinley Yoder & Cantrell	1999	Chronic conditions (generic)	Generic / multiple	USA	1	11178	Attainment	0	NA
236	Schifter	Mckinley Yoder & Cantrell	2011	Chronic conditions (generic)	Generic / multiple	USA	1	11500	Attainment	0	NA
237	Schifter	Mckinley Yoder & Cantrell	2016	Chronic conditions (generic)	Generic / multiple	USA	1	36507	Attainment	0	NA
238	Shandra & Hogan	Mckinley Yoder & Cantrell	2009	Chronic conditions (generic)	Generic / multiple	USA	1	2239	Attainment & grade retention	0	NA
239	Sorensen et al	Mckinley Yoder & Cantrell	2011	Chronic conditions (generic)	Generic / multiple	USA	0	144	Grade retention	0	NA
287	Sorensen et al	Moser et al	2011	Chronic conditions (generic)	Generic / multiple	USA	0	144	Standardised tests	0	NA	Ref 32 in paper
165	Stoep et al	Hale et al	2003	Chronic conditions (generic)	Generic / multiple	USA	1	174	Attainment	0	NA
240	Wisk & Weitzman	Mckinley Yoder & Cantrell	2017	Chronic conditions (generic)	Generic / multiple	USA	1	2255	Attainment	0	NA
166	Yan	Hale et al	1998	Chronic conditions (generic)	Generic / multiple	China	0	290	Attainment	0	NA
241	Zablocki & Krezmien	Mckinley Yoder & Cantrell	2013	Chronic conditions (generic)	Generic / multiple	USA	1	5928	Attainment & grade retention	0	NA
32	Bawden et al	Chen et al	2004	Chronic kidney disease	Chronic kidney disease	Canada	0	44	Standardised tests	0	NA
33	Brouhard et al	Chen et al	2000	Chronic kidney disease	Chronic kidney disease	USA	0	124	Standardised tests	0	NA
34	Crocker	Chen et al	2002	Chronic kidney disease	Chronic kidney disease	Canada	0	24	Standardised tests	0	NA	Not listed in biblio
35	Duquette et al	Chen et al	2007	Chronic kidney disease	Chronic kidney disease	USA	0	71	Standardised tests	0	NA
221	Duquette et al	Mckinley Yoder & Cantrell	2007	Chronic kidney disease	Chronic kidney disease	USA	0	71	Grade retention	0	NA
37	Fennell et al	Chen et al	1984	Chronic kidney disease	Chronic kidney disease	USA	0	38	Standardised tests	0	NA
36	Fennell et al	Chen et al	1990	Chronic kidney disease	Chronic kidney disease	USA	0	112	Standardised tests	0	NA
38	Hartung	Chen et al	2014	Chronic kidney disease	Chronic kidney disease	USA	0	66	Standardised tests	0	NA	Not listed in biblio
39	Hooper et al	Chen et al	2011	Chronic kidney disease	Chronic kidney disease	USA	0	368	Standardised tests	0	NA
40	Johnson	Chen et al	2013	Chronic kidney disease	Chronic kidney disease	USA	0	21	Standardised tests	0	NA	Not listed in biblio
41	Lawry et al	Chen et al	1994	Chronic kidney disease	Chronic kidney disease	USA	0	24	Standardised tests	0	NA
323	Arruda & Bigal	Ragnarsson et al	2012	Chronic pain	Chronic pain	Brazil	1	5671	School grades	0	NA
324	Bakoula et al	Ragnarsson et al	2006	Chronic pain	Chronic pain	Greece	1	8130	School grades	0	NA
325	Balague et al	Ragnarsson et al	1994	Chronic pain	Chronic pain	Switzerland	1	1716	School grades	0	NA
326	Boey & Yap	Ragnarsson et al	1999	Chronic pain	Chronic pain	Malaysia	1	148	School grades	0	NA
327	Boey et al	Ragnarsson et al	2003	Chronic pain	Chronic pain	Malaysia	1	1971	Perceived achievement	0	NA
328	Campo et al	Ragnarsson et al	2002	Chronic pain	Chronic pain	USA & Canada	1	21065	School grades	0	NA
329	Devanarayana et al	Ragnarsson et al	2008	Chronic pain	Chronic pain	Sri Lanka	1	734	School grades	0	NA
330	Durmaz et al	Ragnarsson et al	2013	Chronic pain	Chronic pain	Turkey	1	244	School grades	0	NA
331	Eryilmaz et al	Ragnarsson et al	2010	Chronic pain	Chronic pain	Turkey	1	1951	Perceived achievement	0	NA
332	Ho et al	Ragnarsson et al	2009	Chronic pain	Chronic pain	Canada	0	57	Standardised tests	0	NA
333	Kashikar et al	Ragnarsson et al	2007	Chronic pain	Chronic pain	USA	0	110	Perceived achievement	0	NA
1	Logan et al	Alsagaff & Coyne	2008	Chronic pain	Chronic pain	USA	0	220	Perceived achievement	0	NA
334	Low Kapalu et al	Ragnarsson et al	2018	Chronic pain	Chronic pain	USA	0	93	Standardised tests	0	NA
2	Matthews	Alsagaff & Coyne	2002	Chronic pain	Chronic pain	UK	0	10	Grade retention	0	NA
335	Metsahonkala et al	Ragnarsson et al	1998	Chronic pain	Chronic pain	Finland	1	3489	Perceived achievement	0	NA
336	Modin et al	Ragnarsson et al	2015	Chronic pain	Chronic pain	Finland & Sweden	1	13108	Perceived achievement	0	NA
337	Pecor et al	Ragnarsson et al	2016	Chronic pain	Chronic pain	USA	1	633	Perceived achievement	0	NA
338	Rocha-Filho & Santos	Ragnarsson et al	2014	Chronic pain	Chronic pain	Brazil	1	192	School grades	0	NA
339	Sabia & Rees	Ragnarsson et al	2011	Chronic pain	Chronic pain	USA	1	9000	School grades	0	Using data on 7,147 to 8,803 young people (depending on analysis) from the US National Longitudinal Study of Adolescent Health examined the association between "suffering from migraine" at baseline (ages 11-22) and educational attainment, measured both as high school grade point average and probability of high school graduation, at wave 3 (ages 18 to 28). After controlling for parental education,…
340	Santinello et al	Ragnarsson et al	2009	Chronic pain	Chronic pain	Italy	1	4386	Perceived achievement	0	NA
341	Shehab & Al-Jarallah	Ragnarsson et al	2005	Chronic pain	Chronic pain	Kuwait	1	400	School grades	0	NA
342	Vervoort et al	Ragnarsson et al	2014	Chronic pain	Chronic pain	Belgium	1	10650	Perceived achievement	0	NA
343	Waldie & Welch	Ragnarsson et al	2007	Chronic pain	Chronic pain	New Zeland	1	971	School grades & attainment	0	NA
400	Ahomaki et al	Schulte et al	2017	CNS tumors	Cancer	Finland	1	4852	Attainment	0	NA
401	Ghaderi et al	Schulte et al	2016	CNS tumors	Cancer	Norway	1	121530	Attainment	0	NA
402	Hornquist et al	Schulte et al	2015	CNS tumors	Cancer	Sweden	1	1523	Attainment	0	NA
77	Bang et al	Cocomello et al	2013	Congenital heart disease	Congenital heart disease	South Korea	0	85	Attainment	0	NA	Based in comparions with norms
78	Brandhagen et al	Cocomello et al	1991	Congenital heart disease	Congenital heart disease	USA	0	168	Attainment	0	NA
67	Bygstad et al	Cocomello et al	2012	Congenital heart disease	Congenital heart disease	Denmark	0	95	Attainment	0	NA	Based in comparions with norms
60	Caruana	Cocomello et al	2016	Congenital heart disease	Congenital heart disease	Malta	0	467	Attainment	0	NA	In meta-analysis
86	Connor et al	Cocomello et al	2019	Congenital heart disease	Congenital heart disease	USA	0	437	Attainment	0	NA	Based in comparions with norms
61	Eren et al	Cocomello et al	2015	Congenital heart disease	Congenital heart disease	Turkey	0	69	Attainment	0	NA	Cited as Kahya in paper; Based in comparions with norms
66	Eslami et al	Cocomello et al	2013	Congenital heart disease	Congenital heart disease	Iran	0	700	Attainment	0	NA	In meta-analysis
74	Fedchenko et al	Cocomello et al	2019	Congenital heart disease	Congenital heart disease	Sweden	0	72	Attainment	0	NA	Based in comparions with norms
58	Karsenty et al	Cocomello et al	2013	Congenital heart disease	Congenital heart disease	France	0	135	Attainment	0	NA	Based in comparions with norms
84	Lillehei et al	Cocomello et al	1986	Congenital heart disease	Congenital heart disease	USA	0	105	Attainment	0	NA
71	Lopez Barreda	Cocomello et al	2020	Congenital heart disease	Congenital heart disease	Chile	0	67	Attainment	0	NA	Cited as Barreda in paper
56	Madsen et al	Cocomello et al	2020	Congenital heart disease	Congenital heart disease	Denmark	1	75824	Attainment	0	NA	In meta-analysis
65	Martínez-Quintana et al	Cocomello et al	2020	Congenital heart disease	Congenital heart disease	Spain	0	169	Attainment	0	NA
73	Moller et al	Cocomello et al	1991	Congenital heart disease	Congenital heart disease	USA	0	290	Attainment	0	NA
79	Moons et al	Cocomello et al	2009	Congenital heart disease	Congenital heart disease	Belgium	0	619	Attainment	0	NA	Based in comparions with norms
70	Nieminen et al	Cocomello et al	2003	Congenital heart disease	Congenital heart disease	Finland	0	2896	Attainment	0	NA	Based in comparions with norms
62	Olsen et al	Cocomello et al	2011	Congenital heart disease	Congenital heart disease	Denmark	1	22603	Attainment	0	NA	In meta-analysis
139	Olsen et al	Glinianaia et al	2011	Congenital heart disease	Congenital heart disease	Denmark	1	32232	Attainment	0	NA
69	Opic et al	Cocomello et al	2015	Congenital heart disease	Congenital heart disease	Netherlands	0	252	Attainment	0	NA	Based in comparions with norms
59	Otterstand et al	Cocomello et al	1986	Congenital heart disease	Congenital heart disease	Norway	0	125	Attainment	0	NA	Based in comparions with norms
63	Pfitzer et al	Cocomello et al	2018	Congenital heart disease	Congenital heart disease	Germany	1	1198	Attainment	0	NA	Based in comparions with norms
81	Rometsch et al	Cocomello et al	2019	Congenital heart disease	Congenital heart disease	Switzerland	0	327	Attainment	0	NA	In meta-analysis
57	Rose et al	Cocomello et al	2005	Congenital heart disease	Congenital heart disease	Germany	0	7466	Attainment	0	NA	In meta-analysis
85	Schiele et al	Cocomello et al	2019	Congenital heart disease	Congenital heart disease	USA	0	169	Attainment	0	NA
75	Shaefer et al	Cocomello et al	2016	Congenital heart disease	Congenital heart disease	Switzerland	0	50269	Attainment	0	NA	In meta-analysis
83	Simko et al	Cocomello et al	2003	Congenital heart disease	Congenital heart disease	USA	0	248	Attainment	0	NA	In meta-analysis
76	Sluman et al	Cocomello et al	2019	Congenital heart disease	Congenital heart disease	International (high income)	0	3989	Attainment	0	NA
64	Soufi et al	Cocomello et al	2013	Congenital heart disease	Congenital heart disease	France	0	60	Attainment	0	NA
82	Steiner et al	Cocomello et al	2020	Congenital heart disease	Congenital heart disease	USA	0	25	Attainment	0	NA
72	Ternestedt et al	Cocomello et al	2001	Congenital heart disease	Congenital heart disease	Sweden	0	26	Attainment	0	NA	Based in comparions with norms
80	Udholm et al	Cocomello et al	2019	Congenital heart disease	Congenital heart disease	Denmark	1	1260	Attainment	0	NA	In meta-analysis
68	Zomer et al	Cocomello et al	2012	Congenital heart disease	Congenital heart disease	Netherlands	0	8306	Attainment	0	NA	In meta-analysis
281	Colegrove & Huntzinger	Moser et al	1994	Cystic fibrosis, haemophilia A, end-stage renal disease and end-stage liver disease	Generic / multiple	USA	0	37	Standardised tests	0	NA	Absence associated with most teacher ratings but no mediation tested. Ref 14 in paper
285	Davis et al	Moser et al	1990	Cystic fibrosis, haemophilia A, end-stage renal disease and end-stage liver disease	Generic / multiple	USA	0	24	Standardised tests & school grades	0	NA	Ref 23 in paper
286	Gilmour et al	Moser et al	2009	Cystic fibrosis, haemophilia A, end-stage renal disease and end-stage liver disease	Generic / multiple	Canada	0	30	Standardised tests	0	NA	Ref 31 in paper
279	Grieve et al	Moser et al	2011	Cystic fibrosis, haemophilia A, end-stage renal disease and end-stage liver disease	Generic / multiple	USA	0	40	Standardised tests & school grades	0	NA	Absence was associated with lower GPA but on standardised tests did not differ from population norms and performed well on GPA. Ref 9 in paper
282	Loveland et al	Moser et al	1994	Cystic fibrosis, haemophilia A, end-stage renal disease and end-stage liver disease	Generic / multiple	USA	0	126	Standardised tests	0	NA	Ref 15 in paper
284	Shapiro et al	Moser et al	2001	Cystic fibrosis, haemophilia A, end-stage renal disease and end-stage liver disease	Generic / multiple	USA	0	131	Standardised tests	0	NA	High number of bleeds associated with more absence, also associated with lower scores on maths and total achievement; mediatio not tested. Ref 17 in paper
283	Usner et al	Moser et al	1998	Cystic fibrosis, haemophilia A, end-stage renal disease and end-stage liver disease	Generic / multiple	USA	0	333	Standardised tests	0	NA	Ref 4 in paper
280	Woolf et al	Moser et al	1989	Cystic fibrosis, haemophilia A, end-stage renal disease and end-stage liver disease	Generic / multiple	USA	0	22	Standardised tests & school grades	0	NA	6/22 performed more than 2 grades below exp in reading; 10/22 in maths. School underachievement did not correlate with absenteeism or GPA. Ref 12 in paper
42	Bardone et al	Clayborne et al	1996	Depression	Depression	New Zealand	1	368	Attainment	0	NA
153	Bardone et al	Hale et al	1996	Depression	Depression	New Zealand	1	198	Attainment	0	NA	In Clayborne
422	Birchwood and Daley 2012	Wickersham et al	2012	Depression	Depression	UK	1	324	School grades	0	NA	In meta-analysis
43	Capaldi & Stoolmiller	Clayborne et al	1999	Depression	Depression	USA	1	206	Attainment	0	NA
425	Chen & Chen	Wickersham et al	2019	Depression	Depression	China	1	1430	School grades	0	NA	In meta-analysis
423	Chen & Li	Wickersham et al	2000	Depression	Depression	China	1	431	School grades	0	NA	In meta-analysis
424	Chen et al	Wickersham et al	2013	Depression	Depression	China	1	1155	School grades	0	NA	In meta-analysis
426	Da Fonseca et al	Wickersham et al	2009	Depression	Depression	France	1	353	School grades	0	NA	In meta-analysis
427	Davies et al	Wickersham et al	2018	Depression	Depression	UK	1	4398	School grades	0	NA
428	Denault et al	Wickersham et al	2009	Depression	Depression	Canada	1	362	School grades	0	NA	In meta-analysis
44	Fergusson & Woodward	Clayborne et al	2002	Depression	Depression	New Zealand	1	964	Attainment	0	NA
156	Fergusson & Woodward	Hale et al	2002	Depression	Depression	New Zealand	1	648	Attainment	0	NA	In Clayborne
45	Fleming et al	Clayborne et al	1993	Depression	Depression	Canada	1	652	Attainment	0	NA
157	Fleming et al	Hale et al	1993	Depression	Depression	Canada	1	94	Attainment	0	NA	In Clayborne
46	Franko et al	Clayborne et al	2005	Depression	Depression	USA	1	1727	Attainment	0	NA
429	Fu et al	Wickersham et al	2018	Depression	Depression	China	1	336	School grades	0	NA	In meta-analysis
47	Giaconia et al	Clayborne et al	2001	Depression	Depression	USA	1	365	Attainment	0	NA
161	Giaconia et al	Hale et al	2001	Depression	Depression	USA	1	344	Attainment	0	NA	In Clayborne
430	Hood et al	Wickersham et al	2017	Depression	Depression	Australia	1	244	School grades	0	NA	In meta-analysis
431	Ialongo et al	Wickersham et al	2001	Depression	Depression	USA	1	625	School grades	0	NA
48	Johnson et al	Clayborne et al	1999	Depression	Depression	USA	1	736	Attainment	0	NA
49	Jonsson et al	Clayborne et al	2010	Depression	Depression	USA	1	609	Attainment	0	NA
163	Jonsson et al	Hale et al	2010	Depression	Depression	Sweden	1	588	Attainment	0	NA	In Clayborne
432	Jonsson et al	Wickersham et al	2010	Depression	Depression	Sweden	1	588	School grades	0	NA
50	Kendal & Davies	Clayborne et al	1986	Depression	Depression	USA	1	1004	Attainment	0	NA
433	Kim et al	Wickersham et al	2013	Depression	Depression	USA	1	379	School grades	0	NA	In meta-analysis
434	Kim et al	Wickersham et al	2015	Depression	Depression	USA	1	350	School grades	0	NA	In meta-analysis
435	Kingery et al	Wickersham et al	2011	Depression	Depression	USA	1	365	School grades	0	NA	In meta-analysis
436	Lepore & Kliewer	Wickersham et al	2013	Depression	Depression	USA	1	498	School grades	0	NA	In meta-analysis
437	Liu et al	Wickersham et al	2018	Depression	Depression	China	1	945	School grades	0	NA	In meta-analysis
438	Luthar	Wickersham et al	1995	Depression	Depression	USA	1	138	School grades	0	NA	In meta-analysis
440	Morales et Guerra	Wickersham et al	2006	Depression	Depression	USA	1	2745	Standardised tests	0	NA	In meta-analysis
51	Needham	Clayborne et al	2009	Depression	Depression	USA	1	14232	Attainment	0	NA
164	Needham	Hale et al	2009	Depression	Depression	USA	1	14221	Attainment	0	NA	In Clayborne
441	Nishina et al	Wickersham et al	2005	Depression	Depression	USA	1	1526	School grades	0	NA	In meta-analysis
442	Pate et al	Wickersham et al	2017	Depression	Depression	USA	1	7276	School grades	0	NA	In meta-analysis
52	Quiroga et al	Clayborne et al	2012	Depression	Depression	Canada	1	453	Attainment	0	NA
92	Quiroga et al	Esch et al	2012	Depression	Depression	Canada	1	453	Attainment	0	NA
53	Rao et al	Clayborne et al	1995	Depression	Depression	USA	0	63	Attainment	0	NA
443	Riglin et al	Wickersham et al	2013	Depression	Depression	UK	1	202	School grades	0	NA	In meta-analysis
444	Rockhill et al	Wickersham et al	2009	Depression	Depression	USA	1	521	School grades	0	NA
445	Rothon et al	Wickersham et al	2009	Depression	Depression	UK	1	1636	School grades	0	NA
446	Rothon et al	Wickersham et al	2011	Depression	Depression	UK	1	2499	School grades	0	NA
447	Schwartz et al	Wickersham et al	2005	Depression	Depression	USA	1	199	School grades	0	NA
448	Shahar et al	Wickersham et al	2006	Depression	Depression	USA	1	460	School grades	0	NA	In meta-analysis
449	Steele et al	Wickersham et al	2000	Depression	Depression	USA	1	129	School grades	0	NA	In meta-analysis
54	Vida et al	Clayborne et al	2009	Depression	Depression	Canada	1	219	Attainment	0	NA
450	Wang & Sheikh-Khalil	Wickersham et al	2014	Depression	Depression	USA	1	935	School grades	0	NA
451	Weidman et al	Wickersham et al	2015	Depression	Depression	USA	1	130	School grades	0	NA	In meta-analysis
55	Wissman et al	Clayborne et al	1999	Depression	Depression	USA	0	110	Attainment	0	NA
452	Zhang et al	Wickersham et al	2019	Depression	Depression	China	1	648	School grades	0	NA	In meta-analysis
453	Aldenkamp et al	Wo et al	2005	Epilepsy	Epilepsy	Netherlands	0	176	Standardised tests	0	NA
454	Austin et al	Wo et al	1998	Epilepsy	Epilepsy	USA	0	225	Standardised tests	0	NA
305	Baca et al 2017	Puka et al	2017	Epilepsy	Epilepsy	USA	1	333	Attainment	0	NA
455	Braakman et al	Wo et al	2012	Epilepsy	Epilepsy	Netherlands	0	50	Standardised tests	0	NA
306	Camfield et al	Puka et al	2016	Epilepsy	Epilepsy	Canada	1	291	Attainment	0	NA
456	Caplan et al	Wo et al	2006	Epilepsy	Epilepsy	USA	0	149	Standardised tests	0	NA
457	Chambers et al	Wo et al	2014	Epilepsy	Epilepsy	Jamaica	0	66	Standardised tests	0	NA
307	Chin et al	Puka et al	2011	Epilepsy	Epilepsy	UK	1	65	Attainment	0	NA
458	Drewel et al	Wo et al	2009	Epilepsy	Epilepsy	USA	0	173	Standardised tests	0	NA
308	Ehrstedt et al	Puka et al	2017	Epilepsy	Epilepsy	Sweden	0	20	Attainment	0	NA
459	Gulgonen et al	Wo et al	2000	Epilepsy	Epilepsy	Turkey	0	42	Standardised tests	0	NA
471	Hermann et al	Wo et al	2008	Epilepsy	Epilepsy	USA	0	62	Standardised tests	0	NA
309	Holtkamp et al	Puka et al	2014	Epilepsy	Epilepsy	Germany	0	75	Attainment	0	NA
460	Jackson et al	Wo et al	2013	Epilepsy	Epilepsy	USA	0	166	Standardised tests	0	NA
310	Jalava et al	Puka et al	1997	Epilepsy	Epilepsy	Finland	1	95	Attainment	0	NA
311	Jennum et al	Puka et al	2016	Epilepsy	Epilepsy	Denmark	1	11400	Attainment	0	NA
472	Jones et al	Wo et al	2010	Epilepsy	Epilepsy	USA	0	82	Standardised tests	0	NA
312	Kokkonen et al	Puka et al	1997	Epilepsy	Epilepsy	Finland	1	81	Attainment	0	NA
313	Lach et al	Puka et al	2010	Epilepsy	Epilepsy	Canada	0	71	Attainment	0	NA
461	Mitchell et al	Wo et al	1991	Epilepsy	Epilepsy	USA	0	78	Standardised tests	0	NA
462	Miziara et al	Wo et al	2012	Epilepsy	Epilepsy	Brazil	0	71	Standardised tests	0	NA
463	Overvliet et al	Wo et al	2011	Epilepsy	Epilepsy	Netherlands	0	48	Standardised tests	0	NA
314	Puka & Smith	Puka et al	2016	Epilepsy	Epilepsy	Canada	0	78	Attainment	0	NA
315	Schneider-von Podweils et al	Puka et al	2014	Epilepsy	Epilepsy	Germany	1	30	Attainment	0	NA
464	Schoenfeld et al	Wo et al	1998	Epilepsy	Epilepsy	USA	0	84	Standardised tests	0	NA
465	Seidenberg et al	Wo et al	1986	Epilepsy	Epilepsy	USA	0	122	Standardised tests	0	NA
316	Shackleton et al	Puka et al	2003	Epilepsy	Epilepsy	Netherlands	0	164	Attainment	0	NA
317	Sillanpää	Puka et al	1990	Epilepsy	Epilepsy	Finland	1	171	Attainment	0	NA
318	Syvertsen et al	Puka et al	2014	Epilepsy	Epilepsy	Norway	0	37	Attainment	0	NA
319	Szabo et al	Puka et al	2001	Epilepsy	Epilepsy	USA	0	16	Attainment	0	NA
466	Tedrus et al	Wo et al	2009	Epilepsy	Epilepsy	Brazil	0	69	Standardised tests	0	NA
320	Wakamoto et al	Puka et al	2000	Epilepsy	Epilepsy	Japan	1	148	Attainment	0	NA
468	Williams et al	Wo et al	1996	Epilepsy	Epilepsy	USA	0	84	Standardised tests	0	NA
467	Williams et al	Wo et al	2001	Epilepsy	Epilepsy	USA	0	65	Standardised tests	0	NA
321	Wilson et al	Puka et al	2012	Epilepsy	Epilepsy	Australia	1	34	Attainment	0	NA
322	Wirrell et al	Puka et al	1997	Epilepsy	Epilepsy	Canada	1	55	Attainment	0	NA
121	Ayr et al	Glinianaia et al	2005	Major structural congenital anomalies	Major structural congenital anomalies	USA	0	50	Standardised tests	0	NA
122	Barnes et al	Glinianaia et al	2006	Major structural congenital anomalies	Major structural congenital anomalies	USA	0	192	Standardised tests	0	NA
123	Bell 2017b	Glinianaia et al	2017	Major structural congenital anomalies	Major structural congenital anomalies	Australia	1	3238	School grades	0	NA
124	Bellinger et al	Glinianaia et al	2015	Major structural congenital anomalies	Major structural congenital anomalies	USA	0	178	Standardised tests	0	NA
125	Broder et al	Glinianaia et al	1998	Major structural congenital anomalies	Major structural congenital anomalies	USA	0	168	School grades	0	NA
126	Chapman	Glinianaia et al	2011	Major structural congenital anomalies	Major structural congenital anomalies	USA	0	56	Standardised tests	0	NA
127	Clausen et al	Glinianaia et al	2017	Major structural congenital anomalies	Major structural congenital anomalies	Denmark	1	14293	School grades	0	NA
128	Collett et al	Glinianaia et al	2010	Major structural congenital anomalies	Major structural congenital anomalies	USA	0	94	Standardised tests	0	NA
129	Fitzsimons et al	Glinianaia et al	2018	Major structural congenital anomalies	Major structural congenital anomalies	UK	1	2802	School grades	0	NA
130	Fitzsimons et al	Glinianaia et al	2021	Major structural congenital anomalies	Major structural congenital anomalies	UK	1	3253	School grades	1	Absence did not mediate the assocation between cleft type and lower attainment. Cited Bell 2017: Absence adjusted for at start with others but effect not isolated
131	Fletcher et al	Glinianaia et al	2005	Major structural congenital anomalies	Major structural congenital anomalies	USA	0	268	Standardised tests	0	NA
132	Friedrich et al	Glinianaia et al	1991	Major structural congenital anomalies	Major structural congenital anomalies	USA	0	68	Standardised tests	0	NA
133	Grewal et al	Glinianaia et al	2020	Major structural congenital anomalies	Major structural congenital anomalies	UK	1	205	School grades	0	NA
134	Hentges et al	Glinianaia et al	2011	Major structural congenital anomalies	Major structural congenital anomalies	UK	0	170	Standardised tests	0	NA
135	Lawley et al	Glinianaia et al	2019	Major structural congenital anomalies	Major structural congenital anomalies	Australia	1	262311	School grades	0	NA
136	Magge et al	Glinianaia et al	2002	Major structural congenital anomalies	Major structural congenital anomalies	USA	0	16	Standardised tests	0	NA
137	Mahle et al	Glinianaia et al	2000	Major structural congenital anomalies	Major structural congenital anomalies	USA	0	56	Standardised tests	0	NA
138	Mulkey et al	Glinianaia et al	2016	Major structural congenital anomalies	Major structural congenital anomalies	USA	0	724	School grades	0	NA
140	Oster et al	Glinianaia et al	2017	Major structural congenital anomalies	Major structural congenital anomalies	USA	1	9162	School grades	0	NA
141	Persson et al	Glinianaia et al	2012	Major structural congenital anomalies	Major structural congenital anomalies	Sweden	1	1251396	School grades	0	NA
142	Saervold et al	Glinianaia et al	2019	Major structural congenital anomalies	Major structural congenital anomalies	Norway	0	123	Standardised tests	0	NA
143	Schaefer et al	Glinianaia et al	2016	Major structural congenital anomalies	Major structural congenital anomalies	Switzerland	1	28457	Attainment	0	NA
144	Simons et al	Glinianaia et al	2010	Major structural congenital anomalies	Major structural congenital anomalies	USA	0	13	Standardised tests	0	NA
145	Speltz et al	Glinianaia et al	2015	Major structural congenital anomalies	Major structural congenital anomalies	USA	0	365	Standardised tests	0	NA
146	Speltz et al	Glinianaia et al	2017	Major structural congenital anomalies	Major structural congenital anomalies	USA & Canada	0	436	Standardised tests	0	NA
147	Watkins et al	Glinianaia et al	2017	Major structural congenital anomalies	Major structural congenital anomalies	USA	1	7381	School grades	0	NA
148	Wehby et al	Glinianaia et al	2014	Major structural congenital anomalies	Major structural congenital anomalies	USA	1	2462	Standardised tests	0	NA
149	Wills et al	Glinianaia et al	1990	Major structural congenital anomalies	Major structural congenital anomalies	USA	0	47	Standardised tests	0	NA
150	Wotherspoon et al	Glinianaia et al	2020	Major structural congenital anomalies	Major structural congenital anomalies	Australia	0	21	Standardised tests	0	NA
151	Wray & Sensky	Glinianaia et al	2001	Major structural congenital anomalies	Major structural congenital anomalies	UK	0	98	Standardised tests	0	NA
152	Wright & Nolan	Glinianaia et al	1994	Major structural congenital anomalies	Major structural congenital anomalies	Australia	0	65	Standardised tests	0	NA
108	Barbaresi et al	Esch et al	2007	Mental disorders	Mental disorders	USA	1	1110	Attainment	0	NA
102	Bohon et al	Esch et al	2007	Mental disorders	Mental disorders	USA	1	240	Attainment	0	NA
95	Borges et al	Esch et al	2011	Mental disorders	Mental disorders	Mexico	1	2362	Attainment	0	NA
109	Bray et al	Esch et al	2000	Mental disorders	Mental disorders	USA	1	1392	Attainment	0	NA
114	Breslau et al	Esch et al	2008	Mental disorders	Mental disorders	USA	1	5692	Attainment	0	NA
217	Breslau et al	Mckinley Yoder & Cantrell	2008	Mental disorders	Mental disorders	USA	1	5691	Attainment	0	NA
119	Breslau et al	Esch et al	2012	Mental disorders	Mental disorders	USA	1	29662	Attainment	0	NA
101	Daniel et al	Esch et al	2006	Mental disorders	Mental disorders	USA	1	188	Attainment	0	NA
89	Degenhardt et al	Esch et al	2007	Mental disorders	Mental disorders	Australia	1	1520	Attainment	0	NA
112	Ellickson et al	Esch et al	2001	Mental disorders	Mental disorders	USA	1	4327	Attainment	0	NA
106	Ensminger et al	Esch et al	2003	Mental disorders	Mental disorders	USA	1	952	Attainment	0	NA
97	Fergusson et al	Esch et al	2003	Mental disorders	Mental disorders	New Zealand	1	1265	Attainment	0	NA
118	*	Esch et al	2008	Mental disorders	Mental disorders	USA	1	13000	Attainment	0	NA
100	Goulding et al	Esch et al	2010	Mental disorders	Mental disorders	USA	0	109	Attainment	0	NA
99	Hansen et al	Esch et al	1999	Mental disorders	Mental disorders	USA	0	36	Attainment	0	NA
224	Hansen et al	Mckinley Yoder & Cantrell	1999	Mental disorders	Mental disorders	USA	0	36	Attainment	0	NA
98	Hemphälä & Hodgins	Esch et al	2014	Mental disorders	Mental disorders	Sweden	0	147	Attainment	0	NA
87	Horwood et al	Esch et al	2010	Mental disorders	Mental disorders	Australia and New Zealand	1	6316	Attainment	0	NA
104	Kent et al	Esch et al	2011	Mental disorders	Mental disorders	USA	1	539	Attainment	0	NA
116	Kessler et al	Esch et al	1995	Mental disorders	Mental disorders	USA	1	5877	Attainment	0	NA
110	Kogan et al	Esch et al	2005	Mental disorders	Mental disorders	USA	1	1762	Attainment	0	NA
105	Krohn et al	Esch et al	1997	Mental disorders	Mental disorders	USA	1	775	Attainment	0	NA
115	LeCook et al	Esch et al	2010	Mental disorders	Mental disorders	USA	1	5839	Attainment	0	NA
120	Lee et al	Esch et al	2009	Mental disorders	Mental disorders	World Mental Health Survey	1	41688	Attainment	0	NA
94	Legleye et al	Esch et al	2010	Mental disorders	Mental disorders	France	1	29393	Attainment	0	NA
90	Lynskey et al	Esch et al	2003	Mental disorders	Mental disorders	Australia	1	1535	Attainment	0	NA
103	Marti et al	Esch et al	2010	Mental disorders	Mental disorders	USA	1	496	Attainment	0	NA
113	McCaffrey et al	Esch et al	2010	Mental disorders	Mental disorders	USA	1	4375	Attainment	0	NA
117	McLeod	Esch et al	2012	Mental disorders	Mental disorders	USA	1	6315	Attainment	0	NA
88	Mcshane et al	Esch et al	2004	Mental disorders	Mental disorders	Australia	0	117	Attainment	0	NA
96	Miech et al	Esch et al	1999	Mental disorders	Mental disorders	New Zealand	1	901	Attainment	0	NA
111	Porche et al	Esch et al	2011	Mental disorders	Mental disorders	USA	1	2532	Attainment	0	NA
93	Quiroga et al	Esch et al	2013	Mental disorders	Mental disorders	Canada	1	493	Attainment	0	NA
91	Van Ameringen et al	Esch et al	2003	Mental disorders	Mental disorders	Canada	0	201	Attainment	0	NA
107	Vander Stoep et al	Esch et al	2003	Mental disorders	Mental disorders	USA	1	967	Attainment	0	NA
356	Abdelalim et al	Santana et al	2011	Obesity	Obesity	Kuwait	1	1066	School grades	0	NA
404	Afzal & Gortmaker	Segal et al	2015	Obesity	Obesity	USA	1	1991	Standardised tests	0	NA
186	Afzal et al	Martin et al	2015	Obesity	Obesity	USA	1	4663	Standardised tests	0	NA
3	Averett & Stifel	Caird et al	2007	Obesity	Obesity	USA	1	12000	Standardised tests	0	NA
405	Averett & Stifel	Segal et al	2010	Obesity	Obesity	USA	1	12000	Standardised tests	0	NA
4	Bagully	Caird et al	2006	Obesity	Obesity	USA	1	1503	Standardised tests	0	Absence entered into model at last stage with other factors such as SEP so impossible to know its independent effect
357	Barrigas & Fragoso	Santana et al	2012	Obesity	Obesity	Portugal	1	792	School grades	0	NA
358	Baxter et al	Santana et al	2011	Obesity	Obesity	Colombia	1	920	Standardised tests	0	NA
359	Baxter et al	Santana et al	2013	Obesity	Obesity	Colombia	1	1504	Standardised tests	0	NA
187	Bisset et al	Martin et al	2012	Obesity	Obesity	Canada	1	1959	School grades	0	NA
406	Bisset et al	Segal et al	2013	Obesity	Obesity	Canada	1	1959	Standardised tests	0	NA
407	Black et al	Segal et al	2015	Obesity	Obesity	Australia	1	4983	Standardised tests	1	For both literracy and mathematics scores, obesity was associated with lower achievement across a range of model specifications, including adjusting for confounders. Further adjusting for being often or always absent in the previous month because of not feeling well did not change the coefficient estimates, thus indicating that illness-related school absence was not likely a mediator.
188	Black et al	Martin et al	2015	Obesity	Obesity	Australia	1	7225	School grades	0	NA
189	Booth et al	Martin et al	2014	Obesity	Obesity	UK	1	4260	School grades	0	NA
408	Capogrossi & You	Segal et al	2013	Obesity	Obesity	USA	1	21260	Standardised tests	0	NA
190	Capogrossi et al	Martin et al	2013	Obesity	Obesity	USA	1	21260	Standardised tests	0	NA
191	Carter et al	Martin et al	2010	Obesity	Obesity	Canada	1	2582	Standardised tests	0	NA
5	Castelli et al	Caird et al	2007	Obesity	Obesity	USA	1	259	Standardised tests	0	NA
192	Chen et al	Martin et al	2012	Obesity	Obesity	Taiwan	1	409	School grades	0	NA
6	Chomitz et al	Caird et al	2009	Obesity	Obesity	USA	1	1103	Standardised tests	0	NA
7	Chowdhury et al	Caird et al	2008	Obesity	Obesity	USA	1	8594	Standardised tests	0	NA
364	Clark & Slate	Santana et al	2009	Obesity	Obesity	USA	1	9471	Standardised tests & school grades	0	NA
8	Cottrell et al	Caird et al	2007	Obesity	Obesity	USA	1	968	Standardised tests	0	NA
9	Crosnoe & Muller	Caird et al	2004	Obesity	Obesity	USA	1	11658	School grades	0	NA
193	Cueto	Martin et al	2005	Obesity	Obesity	Peru	1	438	School grades	0	NA
10	Datar & Sturm	Caird et al	2006	Obesity	Obesity	USA	1	7000	Standardised tests	0	NA
11	Datar et al	Caird et al	2004	Obesity	Obesity	USA	1	11192	Standardised tests	0	NA
12	Ding et al	Caird et al	2006	Obesity	Obesity	USA	1	807	School grades	0	NA
410	Ding et al	Segal et al	2009	Obesity	Obesity	USA	1	893	School grades	0	NA
368	Eide et al	Santana et al	2010	Obesity	Obesity	USA	1	2908	Standardised tests	0	NA
13	Elrod	Caird et al	2008	Obesity	Obesity	USA	1	3369	School grades	0	NA
14	Fletcher & Lehrer	Caird et al	2008	Obesity	Obesity	USA	1	1684	Standardised tests	0	NA
411	Fletcher & Lehrer	Segal et al	2011	Obesity	Obesity	USA	1	1684	Standardised tests & school grades	0	NA
15	Florence et al	Caird et al	2008	Obesity	Obesity	USA	1	4589	Standardised tests	0	NA
16	Gable et al	Caird et al	2008	Obesity	Obesity	USA	1	8000	Standardised tests	0	NA
198	Gable et al	Martin et al	2012	Obesity	Obesity	USA	1	6250	Standardised tests	0	NA
369	Gable et al	Santana et al	2012	Obesity	Obesity	USA	1	6680	Standardised tests	0	NA
17	Gregg et al	Caird et al	2008	Obesity	Obesity	UK	1	9476	School grades	0	NA
370	Gurley-Calvez & Higginbotham	Santana et al	2010	Obesity	Obesity	USA	1	2010	Standardised tests	0	NA
371	Harrington	Santana et al	2013	Obesity	Obesity	USA	1	2013	Standardised tests	0	NA
372	Heshmat et al	Santana et al	2014	Obesity	Obesity	Iran	1	69	School grades	0	NA
18	Huang et al	Caird et al	2006	Obesity	Obesity	USA	1	666	School grades	0	NA
373	Huang et al	Santana et al	2015	Obesity	Obesity	Denmark	1	525	Standardised tests	0	NA
19	Judge & Jahns	Caird et al	2007	Obesity	Obesity	USA	1	13680	Standardised tests	0	NA
21	Kaestner & Grossman	Caird et al	2008	Obesity	Obesity	USA	1	12000	Standardised tests	0	NA
375	Kaestner & Grossman	Santana et al	2009	Obesity	Obesity	USA	1	2500	Standardised tests	0	NA
20	Kaestner et al	Caird et al	2009	Obesity	Obesity	USA	1	2668	Standardised tests	0	NA
376	Kamijo et al	Santana et al	2012	Obesity	Obesity	USA	1	126	Standardised tests	0	NA
377	Kang et al	Santana et al	2016	Obesity	Obesity	Korea	1	1652	School grades	0	NA
378	Kantomaa et al	Santana et al	2013	Obesity	Obesity	Finland	1	8061	School grades	0	NA
199	Kenney et al	Martin et al	2015	Obesity	Obesity	USA	1	3362	Standardised tests	0	NA
22	Kim et al	Caird et al	2003	Obesity	Obesity	South Korea	1	6463	School grades	0	NA
200	Kranjac	Martin et al	2015	Obesity	Obesity	USA	1	5072	Standardised tests	0	NA
379	LeBlanc et al	Santana et al	2012	Obesity	Obesity	USA	1	1963	School grades	0	NA
201	Li & O'Connelly 2012	Martin et al	2012	Obesity	Obesity	USA	1	6178	Standardised tests	0	NA
23	Li et al	Caird et al	2008	Obesity	Obesity	USA	1	2519	Standardised tests	0	NA
202	Lu et al	Martin et al	2014	Obesity	Obesity	Taiwan	1	8690	Standardised tests	0	NA
203	Manes	Martin et al	2015	Obesity	Obesity	USA	1	915	Standardised tests	0	NA
24	Mikkila et al	Caird et al	2003	Obesity	Obesity	Finland	1	60252	School grades	0	NA
380	Morita et al	Santana et al	2016	Obesity	Obesity	Japan	1	315	School grades	0	NA
204	Mo-Suwan et al	Martin et al	1999	Obesity	Obesity	Thailand	1	2252	School grades	0	NA
205	Murasko et al	Martin et al	2015	Obesity	Obesity	USA	1	28770	Standardised tests	0	NA
416	Okunade et al	Segal et al	2009	Obesity	Obesity	USA	1	8388	Attainment	0	NA
381	Olivares and García-Rubio	Santana et al	2016	Obesity	Obesity	Chile	1	18746	Standardised tests	0	NA
206	Palermo & Dowd	Martin et al	2012	Obesity	Obesity	USA	1	2820	Standardised tests	0	NA
25	Pesa et al	Caird et al	2000	Obesity	Obesity	USA	1	3197	School grades	0	NA
382	Ramaswamay et al	Santana et al	2010	Obesity	Obesity	USA	1	45	Teacher-reported effort score	0	NA
207	Roberts & Hao	Martin et al	2013	Obesity	Obesity	USA	1	3134	School grades	0	NA
383	Roberts et al	Santana et al	2010	Obesity	Obesity	USA	1	1989	Standardised tests	0	NA
208	Ruijsbroek et al	Martin et al	2015	Obesity	Obesity	Netherlands	1	1531	Standardised tests	0	NA
26	Sabia	Caird et al	2007	Obesity	Obesity	USA	1	5129	School grades	1	Among white females, obesity was associated with lower academic performance after adjusting for a number of covariates. Further adjusting for absence made no difference.
209	Sabia & Rees	Martin et al	2015	Obesity	Obesity	USA	1	11822	School grades	0	NA
419	Shi & Li	Segal et al	2018	Obesity	Obesity	Australia	1	5000	Standardised tests	0	NA
27	Shore et al	Caird et al	2008	Obesity	Obesity	USA	1	566	School grades	0	NA
28	Sigfúsdóttir et al	Caird et al	2007	Obesity	Obesity	Iceland	1	5810	School grades	0	Not possible to assess mediation as entered first with other variables
210	Suchert et al	Martin et al	2016	Obesity	Obesity	Germany	1	1011	Standardised tests	0	NA
211	Telford et al	Martin et al	2012	Obesity	Obesity	Australia	1	757	School grades	0	NA
385	Tonetti et al	Santana et al	2015	Obesity	Obesity	Italy	1	37	School grades	0	NA
386	Torrijos-Niño et al	Santana et al	2014	Obesity	Obesity	Spain	1	893	School grades	0	NA
212	Veldwijk et al	Martin et al	2012	Obesity	Obesity	Netherlands	1	1543	Standardised tests	1	Overweight at 12 years of age was associated with school performance, measured as a standardised test. After adjusting for parental education, skipping breakfast and screen time, overweight was associated with a 0.16 reduction in test scores (95% CI -0.32, 0.00). Further adjustments as follows did not significantly attenuate this coefficient: being bullied (-0.13 [-0.29, 0.03]), mental health inv…
420	von Hinke et al	Segal et al	2012	Obesity	Obesity	UK	1	3001	School grades	0	NA
421	von Hinke et al	Segal et al	2016	Obesity	Obesity	UK	1	4844	School grades	0	NA
29	von Hinke Kessler Scholder et al	Caird et al	2009	Obesity	Obesity	UK	1	3500	School grades	0	NA
213	von Hinke Kessler Scholder et al	Martin et al	2012	Obesity	Obesity	UK	1	3001	School grades	0	NA
30	Wang & Veugelers	Caird et al	2008	Obesity	Obesity	Canada	1	4945	Standardised tests	0	NA
31	Wendt	Caird et al	2009	Obesity	Obesity	USA	1	12719	Standardised tests	0	NA
388	Yau et al	Santana et al	2014	Obesity	Obesity	Netherlands	0	60	Standardised tests	0	NA
389	Zavodny	Santana et al	2013	Obesity	Obesity	USA	1	15795	Standardised tests	0	NA
215	Zavodny et al	Martin et al	2013	Obesity	Obesity	USA	1	18820	Standardised tests	0	NA
344	Ahomaki et al	Saatci et al	2016	Survivors of childhood cancer	Cancer	Finland	1	19456	Attainment	0	NA
345	Allen et al	Saatci et al	1990	Survivors of childhood cancer	Cancer	UK	1	74	Attainment	0	NA
272	Boman et al	Molcho et al	2009	Survivors of childhood cancer	Cancer	Sweden	1	1527	Attainment	0	NA
346	Boman et al	Saatci et al	2010	Survivors of childhood cancer	Cancer	Sweden	1	1457805	Attainment	0	NA
266	Dieluweit et al	Molcho et al	2011	Survivors of childhood cancer	Cancer	Germany	1	1670	Attainment	0	NA
175	Dolgin et al	Langevald et al	1999	Survivors of childhood cancer	Cancer	Israel	0	115	Attainment	0	NA	Ref 3 in paper
265	Dumas et al	Molcho et al	2016	Survivors of childhood cancer	Cancer	France	0	2066	Attainment	0	NA
178	Evans & Radford	Langevald et al	1995	Survivors of childhood cancer	Cancer	UK	0	86	School grades	0	NA	Rdf 6 in prpdr
173	Felder-Puig et al	Langevald et al	1998	Survivors of childhood cancer	Cancer	Austria	0	75	Attainment	0	NA	Ref 7 in paper
277	Gerhadt et al	Molcho et al	2007	Survivors of childhood cancer	Cancer	USA	0	646	Attainment	0	NA
270	Ghaderi et al	Molcho et al	2015	Survivors of childhood cancer	Cancer	Norway	1	1214836	Attainment	0	NA
184	Haupt et al	Langevald et al	1994	Survivors of childhood cancer	Cancer	USA	0	1002	Attainment	0	NA	Ref 12 in paper
183	Hays et al	Langevald et al	1992	Survivors of childhood cancer	Cancer	USA	0	409	Attainment	0	NA	Ref 14 in paper
348	Hudson et al	Saatci et al	2003	Survivors of childhood cancer	Cancer	USA	1	12451	Attainment	0	NA
349	Ishida et al	Saatci et al	2011	Survivors of childhood cancer	Cancer	Japan	0	261	Attainment	0	NA
278	Jacola et al	Molcho et al	2016	Survivors of childhood cancer	Cancer	USA	0	950	Attainment	0	NA
271	Jóhannsdóttir et al	Molcho et al	2010	Survivors of childhood cancer	Cancer	Scandinavia	1	2061	Attainment	0	NA
181	Kaleghan et al	Langevald et al	1988	Survivors of childhood cancer	Cancer	USA	0	5544	Attainment	0	NA	Ref 18 in paper
176	Kingma et al	Langevald et al	2000	Survivors of childhood cancer	Cancer	Netherlands	0	228	Attainment	0	NA	Ref 20 in paper
403	Kuehni et al	Schulte et al	2012	Survivors of childhood cancer	Cancer	Switzerland	0	5317	Attainment	0	NA
351	Lancashire et al	Saatci et al	2010	Survivors of childhood cancer	Cancer	UK	1	10488	Attainment	0	NA
352	Langeveld et al	Saatci et al	2003	Survivors of childhood cancer	Cancer	Netherlands	1	1592	Attainment	0	NA
179	Lansky et al	Langevald et al	1986	Survivors of childhood cancer	Cancer	USA	0	78	Attainment	0	NA	Ref 21 in paper
274	Löf et al	Molcho et al	2011	Survivors of childhood cancer	Cancer	Sweden	0	2231	Attainment	0	NA
174	Makipernaa	Langevald et al	1989	Survivors of childhood cancer	Cancer	Finland	0	94	Attainment	0	NA	Ref 24 in paper
353	Maule et al	Saatci et al	2016	Survivors of childhood cancer	Cancer	Italy	1	520	Attainment	0	NA
182	Meadows et al	Langevald et al	1989	Survivors of childhood cancer	Cancer	USA	0	190	Attainment	0	NA	Ref 25 in paper
177	Moe et al	Langevald et al	1997	Survivors of childhood cancer	Cancer	Norway	0	98	Attainment	0	NA	Ref 27 in paper
355	Ness et al	Saatci et al	2005	Survivors of childhood cancer	Cancer	USA	0	628	Attainment	0	NA
268	Nies et al	Molcho et al	2017	Survivors of childhood cancer	Cancer	Netherlands	1	547	Attainment	0	NA
185	Novakovic et al	Langevald et al	1997	Survivors of childhood cancer	Cancer	USA	0	186	Attainment	0	NA	Ref 30 in paper
269	Stam et al	Molcho et al	2005	Survivors of childhood cancer	Cancer	Netherlands	0	861	Attainment	0	NA
180	Wasserman et al	Langevald et al	1987	Survivors of childhood cancer	Cancer	USA	0	40	Attainment	0	NA	Ref 42 in paper
276	Yagci-Kupeli et al	Molcho et al	2013	Survivors of childhood cancer	Cancer	Turkey	0	201	Attainment	0	NA
267	Zynda et al	Molcho et al	2012	Survivors of childhood cancer	Cancer	Germany	1	15048	Attainment	0	NA
167	Blanchette & Smith	Lah et al	2002	Temporal lobe epilepsy	Epilepsy	Canada	0	19	Standardised tests	0	NA
168	Camfield et al	Lah et al	1984	Temporal lobe epilepsy	Epilepsy	Canada	0	27	Standardised tests	0	NA
169	Chaix et al	Lah et al	2006	Temporal lobe epilepsy	Epilepsy	France	0	34	Standardised tests	0	NA
171	Lah & Smith	Lah et al	2014	Temporal lobe epilepsy	Epilepsy	Canada	0	57	Standardised tests	0	NA
172	Lah & Smith	Lah et al	2015	Temporal lobe epilepsy	Epilepsy	Canada	0	40	Standardised tests	0	NA
170	Vanasse et al	Lah et al	2005	Temporal lobe epilepsy	Epilepsy	Canada	0	60	Standardised tests	0	NA
248	Crawford et al	Milton et al	1995	Type 1 diabetes	Type 1 diabetes	Canada	0	54	Standardised tests	0	NA
289	Dahlquist & Källén	Oakley et al	2007	Type 1 diabetes	Type 1 diabetes	Sweden	1	1336127	School grades	0	NA
244	Gath et al	Milton et al	1980	Type 1 diabetes	Type 1 diabetes	UK	0	152	School grades	0	NA
247	Hagen et al	Milton et al	1990	Type 1 diabetes	Type 1 diabetes	USA	0	60	Standardised tests	0	NA
250	Lloyd et al	Milton et al	1992	Type 1 diabetes	Type 1 diabetes	UK	0	80	Attainment	0	NA
243	McCarthy et al	Milton et al	2002	Type 1 diabetes	Type 1 diabetes	USA	0	563	Standardised tests	0	NA
249	Overstreet et al	Milton et al	1997	Type 1 diabetes	Type 1 diabetes	USA	0	116	Standardised tests	0	NA
288	Persson et al	Oakley et al	2013	Type 1 diabetes	Type 1 diabetes	Sweden	1	11955	School grades	0	NA
251	Robinson et al	Milton et al	1993	Type 1 diabetes	Type 1 diabetes	UK	0	371	School grades	0	NA
246	Rovet et al	Milton et al	1988	Type 1 diabetes	Type 1 diabetes	Canada	0	81	Standardised tests	0	NA
242	Rovet et al	Milton et al	1990	Type 1 diabetes	Type 1 diabetes	Canada	0	103	Standardised tests	0	NA
245	Ryan et al	Milton et al	1985	Type 1 diabetes	Type 1 diabetes	USA	0	208	Standardised tests	0	NA
252	Songer et al	Milton et al	1989	Type 1 diabetes	Type 1 diabetes	USA	0	316	Attainment	0	NA
